1 **Redox-controlled structural reorganization and flavin**  
2 **strain within the ribonucleotide reductase R2b-NrdI**  
3 **complex monitored by serial femtosecond**  
4 **crystallography**

5  
6 Juliane John<sup>1</sup>, Oskar Aurelius<sup>1,2</sup>, Vivek Srinivas<sup>1</sup>, In-Sik Kim<sup>3</sup>, Asmit Bhowmick<sup>3</sup>, Philipp S.  
7 Simon<sup>3</sup>, Medhanjali Dasgupta<sup>3</sup>, Cindy Pham<sup>3</sup>, Sheraz Gul<sup>3</sup>, Kyle D. Sutherlin<sup>3</sup>, Pierre Aller<sup>4,5</sup>,  
8 Agata Butryn<sup>4,5,6</sup>, Allen M. Orville<sup>4,5</sup>, Mun Hon Cheah<sup>7</sup>, Shigeki Owada<sup>8,9</sup>, Kensuke Tono<sup>8,9</sup>,  
9 Franklin D. Fuller<sup>10</sup>, Alexander Batyuk<sup>10</sup>, Aaron S. Brewster<sup>3</sup>, Nicholas K. Sauter<sup>3</sup>, Vittal K.  
10 Yachandra<sup>3</sup>, Junko Yano<sup>3</sup>, Jan Kern<sup>3\*</sup>, Hugo Lebrette<sup>1,11\*</sup> & Martin Högbom<sup>1\*</sup>

11  
12 <sup>1</sup>Department of Biochemistry and Biophysics, Stockholm University, Arrhenius Laboratories  
13 for Natural Sciences, Stockholm, Sweden

14 <sup>2</sup>MAX IV Laboratory, Lund University, Lund, Sweden

15 <sup>3</sup>Molecular Biophysics and Integrated Bioimaging Division, Lawrence Berkeley National  
16 Laboratory, Berkeley, CA, USA

17 <sup>4</sup>Diamond Light Source Ltd, Harwell Science and Innovation Campus, Didcot, UK

18 <sup>5</sup>Research Complex at Harwell, Harwell Science and Innovation Campus, OX11 0FA, Didcot,  
19 UK

20 <sup>6</sup>Present address: Macromolecular Machines Laboratory, The Francis Crick Institute, London  
21 NW1 1AT, UK

22 <sup>7</sup>Department of Chemistry - Ångström, Molecular Biomimetics, Uppsala University, SE 751  
23 20 Uppsala, Sweden

24 <sup>8</sup>Japan Synchrotron Radiation Research Institute, 1-1-1 Kouto, Sayo-cho, Sayo-gun, Hyogo,  
25 679-5198, Japan

26 <sup>9</sup>RIKEN SPring-8 Center, 1-1-1 Kouto, Sayo-cho, Sayo-gun, Hyogo, 679-5148, Japan

27 <sup>10</sup>LCLS, SLAC National Accelerator Laboratory, Menlo Park, CA, USA

28 <sup>11</sup>Present address: Laboratoire de Microbiologie et Génétique Moléculaires (LMGM), Centre  
29 de Biologie Intégrative (CBI), CNRS, UPS, Université de Toulouse, Toulouse, France

30

31 \*Corresponding authors: [jfkern@lbl.gov](mailto:jfkern@lbl.gov), [hugo.lebrette@dbb.su.se](mailto:hugo.lebrette@dbb.su.se), [hogbom@dbb.su.se](mailto:hogbom@dbb.su.se)

## 32 Abstract

33

34 Redox reactions are central to biochemistry and are both controlled by and induce protein  
35 structural changes. Here we describe structural rearrangements and crosstalk within the  
36 *Bacillus cereus* ribonucleotide reductase R2b-NrdI complex, a di-metal carboxylate-  
37 flavoprotein system, as part of the mechanism generating the essential catalytic free radical  
38 of the enzyme. Femtosecond crystallography at an X-ray free-electron laser was utilized to  
39 obtain structures at room temperature in defined redox states without suffering  
40 photoreduction. We show that the flavin in the hydroquinone state is under steric strain in  
41 the R2b-NrdI protein complex, presumably tuning its redox potential to promote superoxide  
42 generation. Moreover, a binding site in close vicinity to the expected flavin O<sub>2</sub>-interacton site  
43 is observed to be controlled by the redox state of the flavin and linked to the channel  
44 proposed to funnel the produced superoxide species from NrdI to the di-manganese site in  
45 protein R2b. These specific features are coupled to further structural changes around the R2b-  
46 NrdI interaction surface. The mechanistic implications for the control of reactive oxygen  
47 species and radical generation in protein R2b are discussed.

## 48 Introduction

49 Ribonucleotide reductases (RNRs) are essential metalloenzymes that employ sophisticated  
50 radical chemistry to reduce the 2'-OH group of ribonucleotides and thereby produce  
51 deoxyribonucleotides (dNTPs), the building blocks of DNA. This reaction is the only known  
52 pathway for the *de novo* synthesis of dNTPs. Three classes of RNRs are differentiated based  
53 on their structural features and radical generating mechanism. Class I consists of a radical  
54 generating subunit, R2 and a catalytic subunit, R1. Oxygen is required to generate a radical in  
55 the R2 subunit, which is reversibly shuttled to R1 to initiate the ribonucleotide reduction.  
56 Class I, found in eubacteria and all eukaryotes, is to date divided into five subclasses, Ia – Ie,  
57 based on the type of metal cofactor, metal ligands and radical storage in R2 (Högbom et al.,  
58 2020). The R2 subunit is characterized by a ferritin-like fold housing two metal ions  
59 coordinated by six conserved residues (Nordlund & Reichard, 2006), i.e. two histidines and  
60 four carboxylates (with the exception of subclass Ie (Blaesi et al., 2018; Srinivas et al., 2018)).  
61 The class Ib R2 subunit (R2b) metal site can bind two manganese ions or two iron ions. The  
62 two metal ions are oxidized from the M(II)/M(II) state to a short-lived M(III)/M(IV)  
63 intermediate which decays to M(III)/M(III) while producing a radical species on an adjacent  
64 tyrosyl residue (Tyr·), where it is also stored (Cotruvo et al., 2013; Cotruvo & Stubbe, 2010).  
65 The di-manganese R2b was shown to be the physiologically relevant form of R2b (Cotruvo &  
66 Stubbe, 2010; Cox et al., 2010); it accumulates higher amounts of radical and has higher  
67 enzymatic activity than the di-iron R2b. Molecular oxygen (O<sub>2</sub>) can directly activate the di-iron  
68 R2b (Huque et al., 2000). In contrast, the di-manganese R2b form cannot react with O<sub>2</sub> but  
69 requires a superoxide radical (O<sub>2</sub><sup>•-</sup>) provided by NrdI, a flavoprotein which is generally

70 encoded in the same operon as R2b (Berggren et al., 2014; Cotruvo & Stubbe, 2010; Roca et  
71 al., 2008).

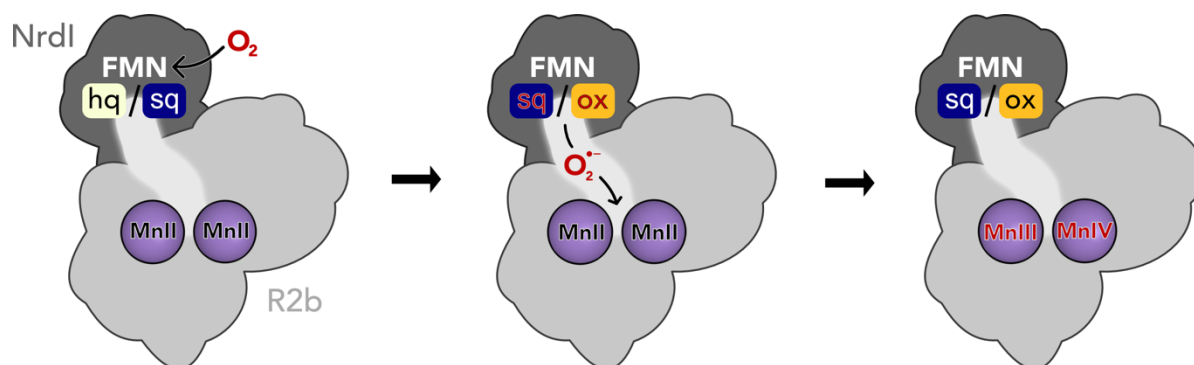

72

73 **Scheme 1 Activation of the di-manganese centre in ribonucleotide reductase class Ib R2.** Both hydroquinone  
74 (hq) and semiquinone (sq) FMN of NrdI can reduce molecular oxygen to superoxide, which is shuttled to the  
75 metal site in R2b and activates the di-manganese cofactor. FMN is oxidized either to semiquinone or the fully  
76 oxidized form (ox) in the process.

77 NrdI is a small, globular protein that binds the redox-active flavin mononucleotide (FMN)  
78 cofactor. NrdI stands out in comparison to other flavodoxins, which perform single one- or  
79 two-electron transfers, by being able to perform two successive one-electron reductions  
80 (Cotruvo & Stubbe, 2008, 2010). Fully reduced NrdI with hydroquinone FMN (NrdI<sub>hq</sub>) can  
81 reduce O<sub>2</sub> to O<sub>2</sub><sup>-</sup> while being oxidized to semiquinone NrdI (NrdI<sub>sq</sub>) (Cotruvo et al., 2013).  
82 NrdI<sub>sq</sub> can in turn produce a second O<sub>2</sub><sup>-</sup> from another O<sub>2</sub> molecule and become fully oxidized  
83 (NrdI<sub>ox</sub>) in the process (Berggren et al., 2014). The oxidation state of NrdI can be followed by  
84 ultraviolet–visible light absorption (UV–vis) spectroscopy. NrdI is faint yellow in the  
85 hydroquinone state, dark blue in the semiquinone state and bright orange in the oxidized  
86 state (Røhr et al., 2010) (Fig. S1). NrdI binds tightly to R2b in a 1:1 ratio with FMN at the  
87 protein–protein interface, forming a dimer of heterodimers. Previously obtained crystal  
88 structures of the R2b-NrdI complex from *Escherichia coli* and *Bacillus cereus* show that a

89 conserved channel connects FMN and the metal site in R2b (Boal et al., 2010; Hammerstad et  
90 al., 2014). This channel is proposed to shuttle  $O_2^{\cdot-}$  produced by NrdI in complex with R2b to  
91 the metal site, where the radical is formed. Here we investigate the structural details and  
92 reaction mechanism of the activation of NrdI by  $O_2$  as well as the subsequent shuttling of  $O_2^{\cdot-}$   
93 to the metal site for the generation of Tyr $\cdot$  in R2b.

94

95 Studying structural changes in redox-active proteins is challenging from an experimental point  
96 of view. X-ray crystallography is a well-suited method for investigating both high-resolution  
97 structural details in the redox-active centres as well as overall reorganization of proteins.  
98 However, both metalloenzymes and flavodoxins are very sensitive to photoreduction during  
99 the exposure to the high-energy X-ray radiation of synchrotron sources. Synchrotron crystal  
100 structures of RNR and NrdI proteins invariably suffer from photoreduction, which complicates  
101 the determination of the oxidation state of redox active centres and has proven to be a  
102 problem for obtaining fully oxidized structures (Gräve et al., 2019; Johansson et al., 2010;  
103 Røhr et al., 2010). While there are well established experimental workarounds like short  
104 exposure times, helical data collection and serial synchrotron crystallography the time-scales  
105 necessary to obtain the diffraction data using these methods cannot fully avoid the reducing  
106 effects of the X-ray radiation (Spence, 2017). Serial femtosecond crystallography (SFX)  
107 overcomes this problem by the so-called diffraction-before-destruction principle (Doerr,  
108 2011; Nass, 2019; Neutze et al., 2000). Short intense X-ray pulses of the duration of only a  
109 few femtoseconds are produced by an X-ray free electron laser (XFEL), illuminating one crystal  
110 and giving rise to one diffraction pattern at a time. The crystal is generally destroyed in the  
111 process and needs to be replaced by a new one for the next image. This method allows to

112 record the scattering information before atomic displacement has time to occur resulting in  
113 a dataset effectively free from the effects of radiation damage (Spence, 2017).

114

115 Here we present the first SFX structures of R2b in complex with NrdI in the oxidized and  
116 hydroquinone state. The datasets reveal redox-dependent structural rearrangements both in  
117 the FMN binding pocket of NrdI and at the protein interface. Despite the significant  
118 rearrangement in the direct vicinity of the cofactor, FMN itself changes surprisingly little  
119 between redox states. This marks an interesting contrast to structures of free NrdI, which  
120 display significant conformational change of FMN between different oxidation states. We  
121 conclude that the R2b-NrdI complex formation is restricting FMN movement and inhibits this  
122 conformational change with implications for its redox potential and O<sub>2</sub> reactivity. We also  
123 describe the first R2b-NrdI complex with a di-manganese metal centre from *Bacillus cereus*.  
124 The metal coordination in both structures blocks access to the channel that connects FMN  
125 and the metal site providing further information on gating and control of catalytic reactive  
126 oxygen species.

## 127 Results

128

129 SFX crystal structures of *Bacillus cereus* R2b in complex with oxidized and

130 hydroquinone NrdI collected at ambient temperature

131

132 An initial crystallization condition for the R2b-NrdI complex was optimized to yield a sufficient  
133 amount of crystals smaller than 100  $\mu\text{m}$  in the longest axis (Fig. S1), the maximum acceptable  
134 crystal size for the experimental setup. Crystals were initially tested at SACLA (SPring-8  
135 Angstrom Compact free electron LAser, Japan) under aerobic conditions with a grease  
136 extruder setup (data not shown) (Sugahara et al., 2015; Tono et al., 2013). The crystals  
137 diffracted to 2  $\text{\AA}$  and proved to be stable under room temperature for several days and sturdy  
138 enough to handle the physical stress of being manipulated for the experiment. At LCLS (Linac  
139 Coherent Light Source at SLAC National Accelerator Laboratory, USA), we obtained two  
140 structures of the *Bacillus cereus* R2b-NrdI (*BcR2b-NrdI*) complex in different defined redox  
141 states by SFX. The datasets were collected at room temperature under anaerobic conditions  
142 using the drop-on-demand sample delivery method (Fuller et al., 2017) (see Materials and  
143 Methods for details).

144

145 *BcR2b* protein was produced metal-free to allow full control over metal loading during  
146 complex reconstitution. The metal content of the protein was determined by total-reflection  
147 X-ray fluorescence (TXRF) and only trace amounts of metals could be detected. The iron and  
148 manganese content per R2b monomer corresponded to metal-to-protein molar ratios of 0.27  
149  $\pm$  0.04%, and 0.07  $\pm$  0.04%, respectively. The *BcR2b-NrdI* complex was reconstituted *in vitro*

150 by mixing both proteins in a molar ratio of 1:1 and set up for batch crystallization. Manganese  
151 was present both during the complex reconstitution and in the crystallization condition.  
152 Crystals for two different datasets were prepared to investigate different oxidation states of  
153 NrdI. The crystals for the first dataset were grown under aerobic conditions, yielding bright  
154 orange crystals, indicating that NrdI was fully oxidized (Fig. S1). The structure from these  
155 crystals is later referred to as *BcR2b<sub>MnMn</sub>-NrdI<sub>ox</sub>* (PDB ID: 7Z3D). The second dataset was  
156 obtained by reducing *BcR2b<sub>MnMn</sub>-NrdI<sub>ox</sub>* crystals chemically with sodium dithionite in an  
157 anaerobic environment. Consequently, the crystal colour changed from bright orange to faint  
158 yellow, indicating that NrdI underwent a two-electron reduction to the hydroquinone state  
159 (Fig. S1). The crystals were subsequently kept under anaerobic conditions, preventing  
160 reoxidation of NrdI. The corresponding structure is denoted *BcR2b<sub>MnMn</sub>-NrdI<sub>hq</sub>* (PDB ID: 7Z3E).

161

## 162 Overall structure

163

164 The two structures were solved in space group  $C222_1$  and are of very similar quality with a  
165 resolution of 2.0 Å and similar unit cell dimensions (Table 1). The asymmetric unit contains  
166 one monomer of the 1:1 *BcR2b*-NrdI complex. The physiological dimer can be generated by  
167 applying crystal symmetry (Fig. 1 A). Clear electron density maps allowed us to model residues  
168 1-299 of 322 for R2b and 1-116 of 118 for NrdI in *BcR2b<sub>MnMn</sub>-NrdI<sub>ox</sub>* and 1-298 of R2b and all  
169 118 residues of NrdI in *BcR2b<sub>MnMn</sub>-NrdI<sub>hq</sub>*. Overall *BcR2b<sub>MnMn</sub>-NrdI<sub>ox</sub>* and *BcR2b<sub>MnMn</sub>-NrdI<sub>hq</sub>* are  
170 similar, as indicated by the C $\alpha$  root-mean-square deviation (RMSD) value of 0.16 Å (Fig. 1 B).  
171 Refinement of both structures was conducted independently from each other following the  
172 same protocol (see Materials and Methods for details) with final  $R_{work}/R_{free}$  of 0.16/0.20 for  
173 *BcR2b<sub>MnMn</sub>-NrdI<sub>ox</sub>* and 0.15/0.18 for *BcR2b<sub>MnMn</sub>-NrdI<sub>hq</sub>* (Table 1). Hammerstad *et al.* previously



174 reported two crystal structures of the *Bc*R2b-NrdI complex (Hammerstad et al., 2014),  
 175 obtained by single-crystal X-ray diffraction at a synchrotron source and under cryogenic  
 176 conditions. Here, however, R2b harbours a di-iron active site. These structures will be referred  
 177 to as *Bc*R2b<sub>FeFe</sub>-NrdI-1 and *Bc*R2b<sub>FeFe</sub>-NrdI-2 (PDB ID: 4BMO and 4BMP, respectively).  
 178 Structural alignment between the published synchrotron and our XFEL structures shows that  
 179 the overall fold of the complex is similar with C $\alpha$ -RMSD values between 0.42 and 0.47 Å (Fig.  
 180 1 B). Compared to the *Bc*R2b<sub>FeFe</sub>-NrdI structures we observe a 7-8 residue extended ordered  
 181 C-terminus in our structures. The C-terminus in *Bc*R2b<sub>MnMn</sub>-NrdI<sub>ox</sub> continues in the same  
 182 orientation as the C-terminal  $\alpha$ -helix without keeping a helical conformation. It interacts with  
 183 a groove between R2b and NrdI extending the R2b-NrdI binding area by forming hydrogen  
 184 bonds to two other  $\alpha$ -helices of R2b and a loop in NrdI (Fig. S2).  
 185

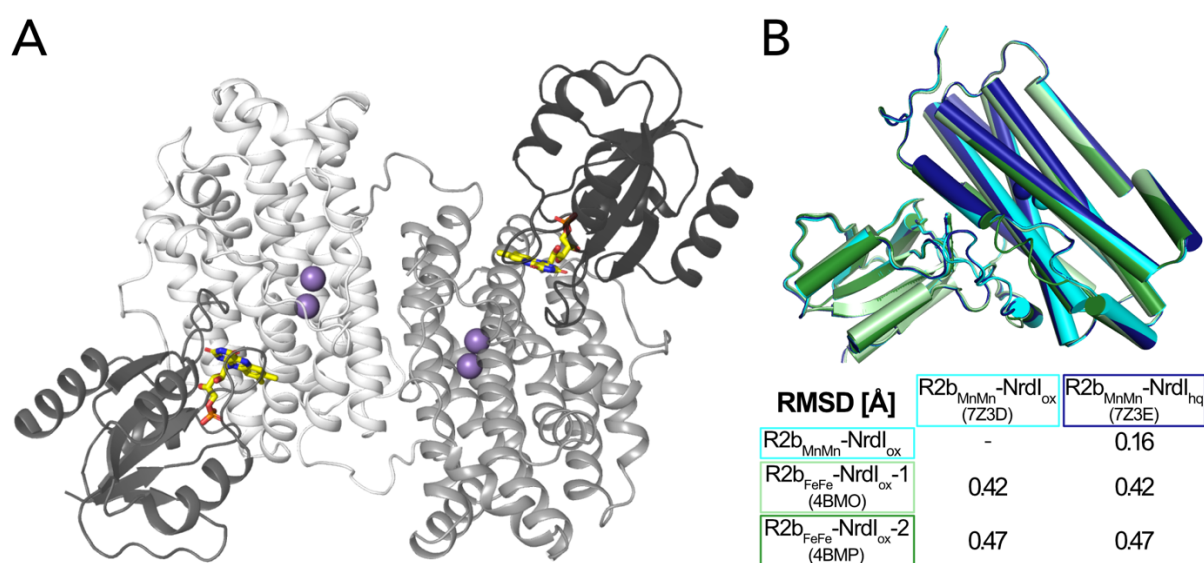

186  
 187 Figure 1 A) **Structure of the *Bc*R2b-NrdI complex** (PDB ID: 7Z3D). In each 1:1 R2b-NrdI dimer, R2b and NrdI are  
 188 coloured in lighter and darker grey, respectively. The second dimer is generated by crystal symmetry.  
 189 Manganese ions are represented as purple spheres and FMN as yellow sticks at the R2b-NrdI interface. B)  
 190 Superimposition of all structures of the *Bc*R2b-NrdI dimer with their corresponding C $\alpha$  RMSD in the table.  
 191 Individual structures are colour coded identically in the figure and the table.

192 Table 1 Data collection and refinement statistics. Values in parenthesis are for the highest resolution shell.

|                                                                                          | <i>BcR2b<sub>MnMn</sub>-NrdI<sub>ox</sub></i> | <i>BcR2b<sub>MnMn</sub>-NrdI<sub>hq</sub></i> |
|------------------------------------------------------------------------------------------|-----------------------------------------------|-----------------------------------------------|
| <b>PDB ID</b>                                                                            | 7Z3D                                          | 7Z3E                                          |
| <b>Data collection statistics</b>                                                        |                                               |                                               |
| <b>XFEL source</b>                                                                       | LCLS MFX                                      | LCLS MFX                                      |
| <b>Wavelength (Å)</b>                                                                    | 1.30                                          | 1.30                                          |
| <b>Space group</b>                                                                       | <i>C</i> 222 <sub>1</sub>                     | <i>C</i> 222 <sub>1</sub>                     |
| <b>Unit cell dimensions a, b, c (Å)</b>                                                  | 61.4, 125.6, 145.0                            | 61.2, 125.8, 144.8                            |
| <b>Unit cell angles <math>\alpha</math>, <math>\beta</math>, <math>\gamma</math> (°)</b> | 90, 90, 90                                    | 90, 90, 90                                    |
| <b>Resolution range (Å)</b>                                                              | 51.59 - 2.0<br>(2.034 - 2.0)                  | 51.47 - 2.0<br>(2.034 - 2.0)                  |
| <b>Unique reflections</b>                                                                | 38319 (1881)                                  | 38188 (1880)                                  |
| <b>Multiplicity</b>                                                                      | 66.94 (25.42)                                 | 59.92 (26.46)                                 |
| <b>Merged lattices</b>                                                                   | 14357                                         | 13509                                         |
| <b>Completeness (%)</b>                                                                  | 99.91 (100)                                   | 99.91 (100)                                   |
| <b>Mean I/sigma (I)</b>                                                                  | 3.247 (0.654)                                 | 3.28 (0.791)                                  |
| <b>Wilson B-factor (Å<sup>2</sup>)</b>                                                   | 35.45                                         | 33.22                                         |
| <b>R<sub>split</sub> (%)</b>                                                             | 11.1 (86.3)                                   | 11.1 (76.5)                                   |
| <b>CC<sub>1/2</sub></b>                                                                  | 0.989 (0.32)                                  | 0.988 (0.39)                                  |
| <b>Refinement statistics</b>                                                             |                                               |                                               |
| <b>Resolution range used in refinement (Å)</b>                                           | 24.17 - 2.0<br>(2.07 - 2.0)                   | 23.91 - 2.0<br>(2.07 - 2.0)                   |
| <b>Reflections used in refinement</b>                                                    | 38253 (3745)                                  | 38119 (3729)                                  |
| <b>Reflections used for R<sub>free</sub></b>                                             | 1909 (206)                                    | 1897 (203)                                    |
| <b>R<sub>work</sub> (%)</b>                                                              | 15.91 (30.40)                                 | 15.16 (28.44)                                 |
| <b>R<sub>free</sub> (%)</b>                                                              | 19.56 (32.27)                                 | 18.37 (31.18)                                 |
| <b>RMSD, bond distances (Å)</b>                                                          | 0.007                                         | 0.007                                         |
| <b>RMSD, bond angles (°)</b>                                                             | 0.79                                          | 0.81                                          |
| <b>Ramachandran favored (%)</b>                                                          | 99.27                                         | 98.79                                         |
| <b>Ramachandran allowed (%)</b>                                                          | 0.73                                          | 1.21                                          |
| <b>Ramachandran outliers (%)</b>                                                         | 0                                             | 0                                             |
| <b>Rotamer outliers (%)</b>                                                              | 0.79                                          | 1.05                                          |
| <b>Clashscore</b>                                                                        | 1.86                                          | 2.58                                          |
| <b>Protein residues (R2b + NrdI)</b>                                                     | 415 (299 + 116)                               | 416 (298 + 118)                               |
| <b>Average B-factor (Å<sup>2</sup>)</b>                                                  | 47.27                                         | 43.66                                         |
| <b>macromolecules</b>                                                                    | 47.24                                         | 43.64                                         |
| <b>ligands</b>                                                                           | 34.66                                         | 30.38                                         |
| <b>solvent</b>                                                                           | 50.57                                         | 47.09                                         |
| <b>Number of non-H atoms</b>                                                             | 3655                                          | 3652                                          |
| <b>macromolecules</b>                                                                    | 3462                                          | 3477                                          |
| <b>ligands</b>                                                                           | 33                                            | 33                                            |
| <b>solvent</b>                                                                           | 160                                           | 142                                           |

194 R2b complex formation prevents butterfly bend of FMN in NrdI

195

196 Three redox states of FMN are physiologically relevant for NrdI: oxidized (FMN<sub>ox</sub>), neutral  
197 semiquinone (FMN<sub>sq</sub>) and anionic hydroquinone (FMN<sub>hq</sub>) (Cotruvo et al., 2013; Røhr et al.,  
198 2010) (Scheme 2). Reduction of free FMN causes the isoalloxazine to bend along the N5-N10  
199 axis leading to a “butterfly bend” where the isoalloxazine moiety deviates from planarity (Fig.  
200 2 A) (Zheng & Ornstein, 1996).

201

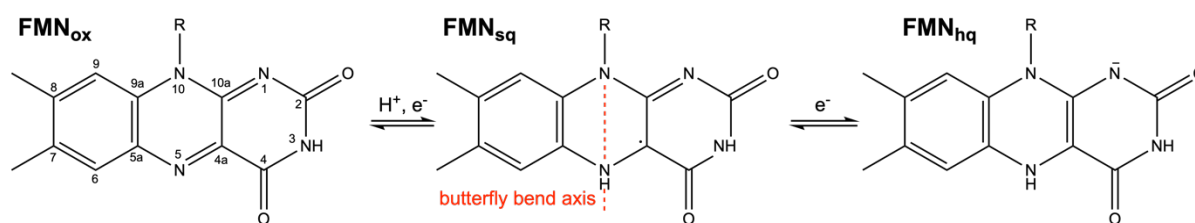

202

203 Scheme 2 The physiologically relevant oxidation states of FMN in NrdI. The red dashed line marks the virtual  
204 axis between N5 and N10. The ribityl phosphate group is denoted as R.

205 NrdI binds one molecule of FMN non-covalently. The pyrimidine ring of the 7,8-dimethyl-  
206 isoalloxazine ring is buried and tightly bound to the protein by a combination of hydrogen  
207 bonds and  $\pi$ -stacking interactions while the benzene ring and part of the phosphate tail are  
208 solvent exposed (Fig. 2 B). The crystal structure of *BcNrdI* has been described previously by  
209 Røhr et. al and shows the FMN-binding pocket on the protein surface (Røhr et al., 2010). The  
210 same study also presents quantum mechanics/molecular mechanics (QM/MM) calculations  
211 of the theoretical butterfly bend for FMN bound to NrdI. The calculated angles are shallow  
212 with  $-3.1^\circ$  for FMN<sub>ox</sub> and  $-3.9^\circ$  for FMN<sub>sq</sub> and more pronounced with  $14.1^\circ$  for FMN<sub>hq</sub> (Fig. 2  
213 A). The authors investigated the influence of photoreduction on the butterfly bend in FMN  
214 bound to *BcNrdI*. The crystals for the first structure (PDB ID: 2X2O, 1.1 Å resolution) were

215 produced from oxidized protein. The measured butterfly bend in this structure is  $4.6^\circ$  and  
216 does thus not correspond well to the calculated  $\text{FMN}_{\text{ox}}$  or  $\text{FMN}_{\text{sq}}$  angle. It does however  
217 resemble the calculated theoretical butterfly bend of  $3.3^\circ$  of the physiologically not relevant  
218 anionic semiquinone state of FMN ( $\text{FMN}_{\text{sq}^-}$ ) (Fig 2 A). The second NrdI structure (PDB ID: 2X2P,  
219  $1.2 \text{ \AA}$  resolution) structure was produced from protein in the semiquinone state and the  
220 butterfly bend was  $11^\circ$  after data collection, similar to the calculated  $\text{FMN}_{\text{hq}}$  angle (Fig. 2 A).  
221 The authors could confirm the reducing effect of the synchrotron radiation on FMN by  
222 comparing Raman spectra of the crystals before and after data collection. These structures  
223 will be referred to as  $\text{BcNrdI}_{\text{ox}+\text{e}}$  and  $\text{BcNrdI}_{\text{sq}+\text{e}}$  to emphasize the photoreduction. Johansson  
224 et al. observed the same discrepancy between the butterfly bend for a synchrotron structure  
225 of initially oxidized NrdI from *Bacillus anthracis* ( $\text{BaNrdI}$ ), a protein with 99% sequence  
226 identity to  $\text{BcNrdI}$  and identical FMN protein environment (Johansson et al., 2010).  $\text{BaNrdI}_{\text{ox}+\text{e}}$   
227 (PDB ID: 2XOD,  $1.0 \text{ \AA}$  resolution) is even more bent than  $\text{BcNrdI}_{\text{ox}+\text{e}}$  with  $5.7^\circ$ , indicating  
228 significant photoreduction of FMN during data collection. Figure 2 A lists the FMN angles of  
229 the calculated and measured structures.

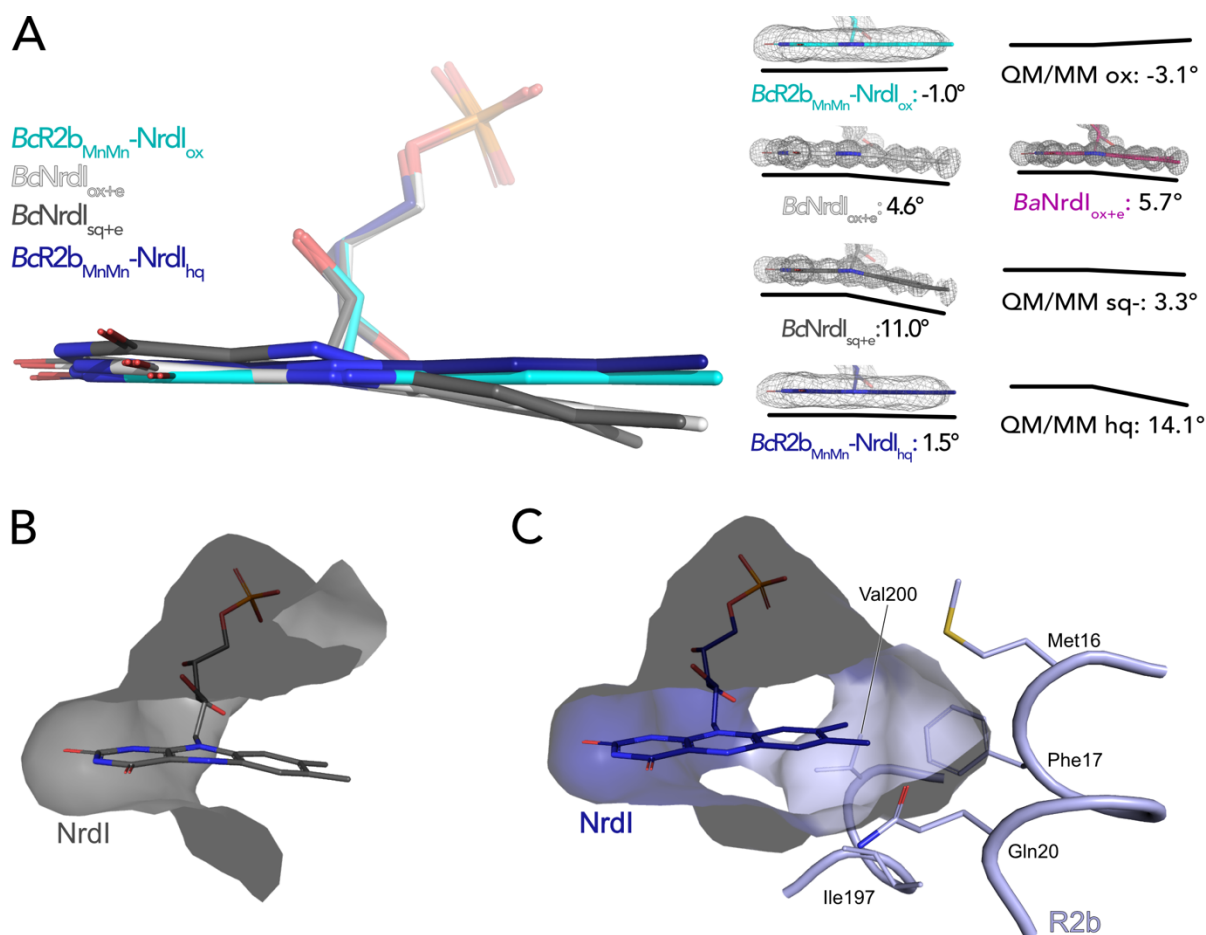

230

231 Figure 2 The butterfly bending conformations of FMN in different redox states. A) Left: Overlay of FMN  
 232 cofactors of *B. cereus* NrdI in different crystal structures; Right: FMN cofactors in *BcNrdI* and *BaNrdI* with 2Fo-Fc  
 233 maps contoured at  $2\sigma$ . Additionally, the theoretical calculated butterfly bend angles of FMN bound to *BcNrdI*  
 234 are shown (Røhr et al., 2010). Dark blue: *BcR2b*<sub>MnMn</sub>-NrdI<sub>hq</sub>, cyan: *BcR2b*<sub>MnMn</sub>-NrdI<sub>ox</sub>, grey: *BcNrdI*<sub>sq+e</sub> (PDB ID:  
 235 2X2P), white: *BcNrdI*<sub>ox+e</sub> (PDB ID: 2X2O), pink: *BaNrdI*<sub>ox+e</sub> (PDB ID: 2XOD). B) The benzene ring of FMN in *BcNrdI*<sub>sq+e</sub>  
 236 (PDB ID: 2X2P) is solvent exposed. C) In *BcR2b*<sub>MnMn</sub>-NrdI<sub>hq</sub> the FMN binding pocket is closed by residues  
 237 contributed by R2b. Relevant residues are shown in sticks. The surface of the FMN binding pocket in NrdI in  
 238 panels B) and C) is shown in grey.

239 The use of SFX allowed us, for the first time, to investigate the conformation of oxidized FMN  
 240 in NrdI. In *BcR2b*<sub>MnMn</sub>-NrdI<sub>ox</sub>, the isoalloxazine moiety of FMN<sub>ox</sub> is almost planar, with a  
 241 butterfly bend of  $-1^\circ$ . This value is comparable to the angle of  $-3.1^\circ$  for FMN<sub>ox</sub> in NrdI  
 242 calculated by QM/MM (Røhr et al., 2010). Unexpectedly, the bend of FMN<sub>hq</sub> in the *BcR2b*<sub>MnMn</sub>-

243 NrdI<sub>hq</sub> structure is minimal with only 1.5 ° and thus similar to FMN<sub>ox</sub> in the *BcR2b*<sub>MnMn</sub>-NrdI<sub>ox</sub>  
244 structure (Fig. 2 A). Additionally, we calculated an isomorphous difference (Fo(ox)-Fo(hq))  
245 map of *BcR2b*<sub>MnMn</sub>-NrdI<sub>ox</sub> and *BcR2b*<sub>MnMn</sub>-NrdI<sub>hq</sub> using the phases of the oxidized dataset.  
246 These maps reduce model bias by directly comparing the experimental data and are very  
247 sensitive to subtle changes of atom positions in different data sets (Rould & Carter, 2003).  
248 The Fo(ox)-Fo(hq) map shows a slight movement of the oxygen on C4 of FMN indicating a  
249 small twist of the pyrimidine ring between both structures but no further bending (Fig. 3). This  
250 angle of *BcR2b*<sub>MnMn</sub>-NrdI<sub>hq</sub> does not correspond to either the calculated bend of FMN of 14.1°  
251 nor the experimental bending angle of *BcNrdI*<sub>sq+e</sub> of 11°. In the R2b-NrdI complex the solvent  
252 exposed part of FMN is covered by R2b, which closes the binding pocket. The residues Met16  
253 Phe17, Ile197 and Val200 of the R2b subunit interact hydrophobically with the benzene ring,  
254 while Gln20 is sterically hindering it from bending (Fig. 2 C). Together they form a rigid binding  
255 pocket for the isoalloxazine moiety of the cofactor, thereby preventing FMN<sub>hq</sub> from bending.

256

## 257 Reorganization of FMN environment and binding position controlled by FMN redox 258 state

259

260 The change of redox state of FMN causes movement around the cofactor in both proteins.  
261 Alignment of the NrdI backbone of the *BcR2b*<sub>MnMn</sub>-NrdI<sub>ox</sub> and the *BcR2b*<sub>MnMn</sub>-NrdI<sub>hq</sub> structures  
262 shows a clear reorganization in the 40s loop close to the isoalloxazine ring of FMN (Fig. 3 A).  
263 The biggest change can be seen for C $\alpha$  of Gly44 and a smaller shift for C $\alpha$  of Thr43 and Phe45.  
264 The reorganization of the 40s loop of NrdI after reduction is also apparent in the superposition  
265 of both structures and in the Fo(ox)-Fo(hq) map (Fig. 3 B and C). Notably, Gly44 of NrdI is  
266 flipped by 180° and forms a hydrogen bond with the hydrogen of N5 on FMN. The hydrogen

267 bond between O4 of FMN and Gly46 shifts slightly. Thr43 in turn is shifted towards FMN and  
268 its side chain is rotated by 180°; Phe45 is also slightly rotated (Fig. 3 C). This redox-dependent  
269 conformational change of residues 43 to 45 was previously also observed in crystal structures  
270 of *BcNrdI* and *BaNrdI* in absence of the R2b subunit (PDB ID: 2X2O, 2X2P, 2XOD, 2XOE)  
271 (Johansson et al., 2010; Røhr et al., 2010).

272

273 Redox-induced changes are also visible on the side of the isoalloxazine ring facing R2b. An  
274 unknown molecule is bound within 5 Å from the reactive C4a of FMN in *BcR2b<sub>MnMn</sub>-NrdI<sub>ox</sub>*,  
275 which binds O<sub>2</sub> to reduce it to O<sub>2</sub><sup>-</sup> (Ghisla & Massey, 1989). The molecule is 3- coordinated to  
276 Trp74 (*NrdI*), Ser196 (R2b) and a water (p-ox in Fig. 3 D and E). A similar density was previously  
277 observed in the di-iron *BcR2b-NrdI* synchrotron structures where it was modelled as a  
278 chloride ion. In our structure, placing a water in this position does not sufficiently explain the  
279 density while modelling it as a chloride ion leaves no residual density (Fig. S3). Chloride is  
280 abundant in the crystallization condition; however, serine and tryptophane are not typical  
281 chloride ligands (Carugo, 2014). The exact nature of the molecule could not be determined  
282 and was thus left as a water in the final model. Interestingly, the binding position undergoes  
283 a redox dependent switch: In the reduced structure the density is instead found at a position  
284 between the oxygen on C2 of FMN<sub>hq</sub> and Asn71 of *NrdI*, 7 Å from the reactive C4a. Two  
285 adjacent water molecules make the unknown molecule 4-coordinated (p-hq in Fig. 3 D and  
286 E). To accommodate for the change of position residues Met77, Trp74, Asn71 and Glu98 from  
287 *NrdI* and Ser196 from R2b move in a plane parallel to the FMN isoalloxazine ring (Fig. 3 D and  
288 E). The unidentified molecule exchanges position with two different water molecules of the  
289 well-ordered solvent network connecting FMN with the active site in R2b. The solvent  
290 network is housed by a channel between both proteins lined by the side chains of Ser162,

291 Tyr166, Lys263 and Asn267 and the mainchain of Glu195 and Ser196 (Hammerstad et al.,  
292 2014). The position of the density in *BcR2b*<sub>MnMn</sub>-NrdI<sub>ox</sub> is close to the channel entrance on the  
293 R2b surface marked by Lys263, Asn267 and Ser196 (Fig. S4). Despite the large structural  
294 rearrangements around the FMN, the Fo(ox)-Fo(hq) map clearly shows that no redox-induced  
295 movement protrudes further down the channel and that the coordination of the metal site is  
296 unaffected by the change of NrdI redox state (Fig. 3 B and S4).



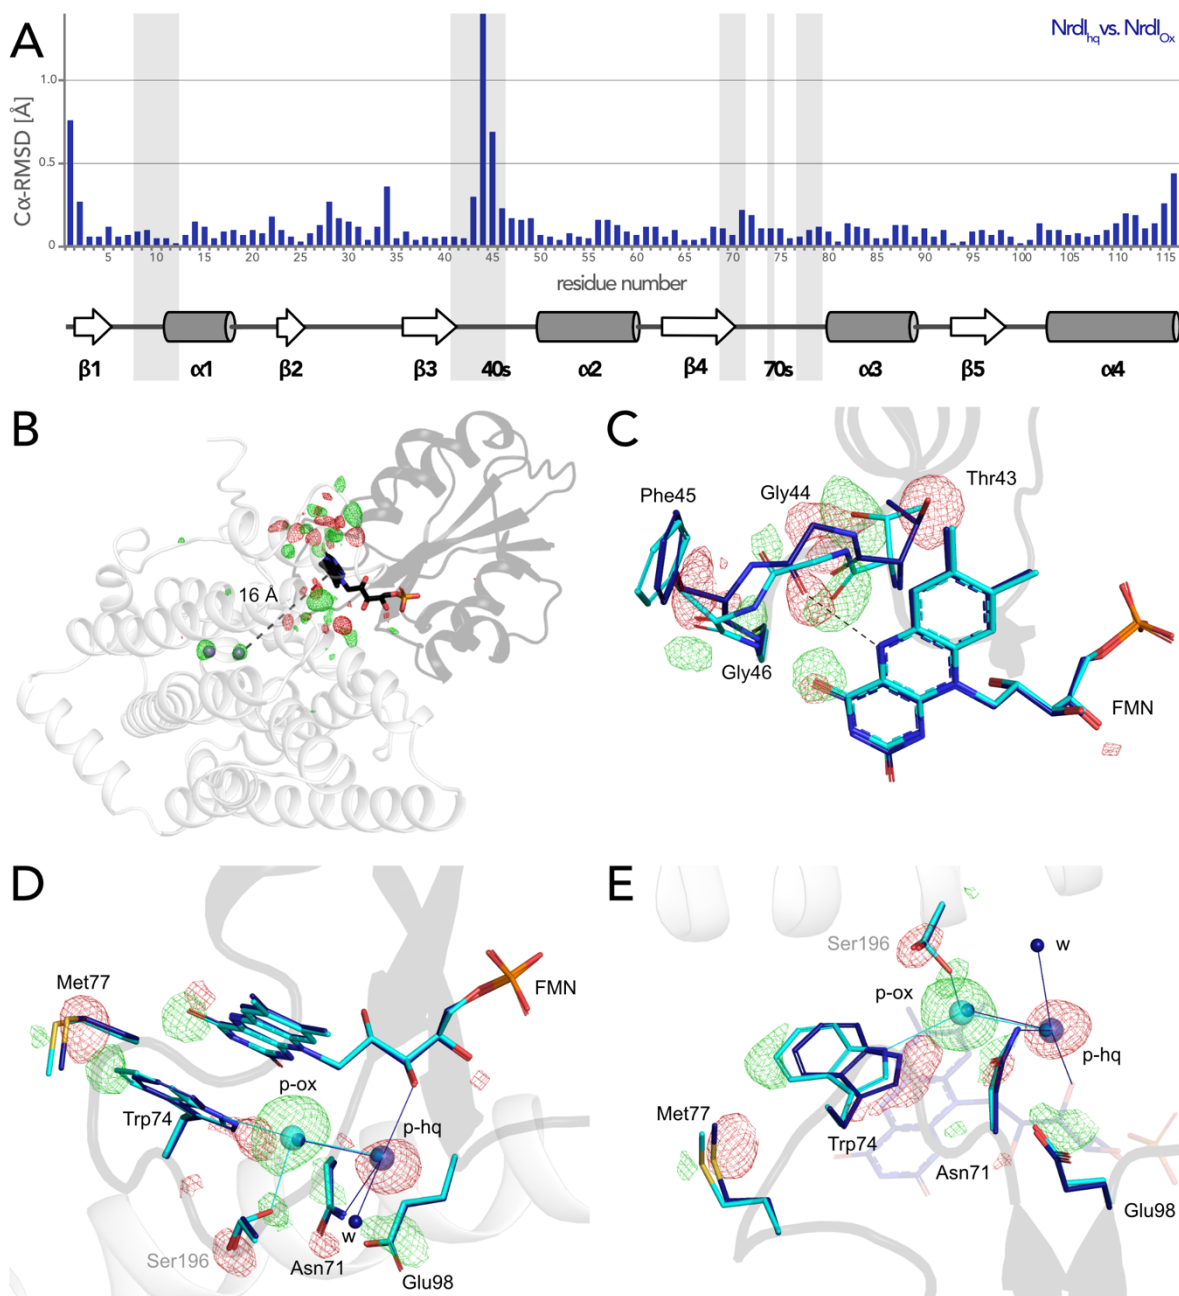

297

298 **Figure 3 FMN environment in the oxidized and hydroquinone BcR2b-NrdI.** A) Structural alignment of NrdI

299 *BcR2b*<sub>MnMn</sub>-NrdI<sub>ox</sub> compared to *BcR2b*<sub>MnMn</sub>-NrdI<sub>hq</sub>. Cα-RMSD in Å are shown for each residue of NrdI between the

300 two models. The secondary structure assignment corresponding to the residues of NrdI is represented in the

301 cartoon below. NrdI interactions with FMN are marked with light grey background B) Fo(ox)-Fo(hq) map

302 contoured at 4.5 σ for the *BcR2b*-NrdI complex with positive density in green and negative density in red. FMN

303 are shown in sticks, manganese ions as purple spheres, R2b as transparent cartoon in white and NrdI in

304 transparent black. Differences between both datasets cluster around the FMN at the R2b/NrdI interface. The

305 distance between metal site and FMN is around 16 Å, marked with a dashed line. C) + D) + E) Close-ups of the

306 difference density around the FMN from different angles including superposition of *BcR2b<sub>MnMn</sub>-NrdI<sub>hq</sub>* in dark  
307 blue and *BcR2b<sub>MnMn</sub>-NrdI<sub>ox</sub>* in cyan. Fo(ox)-Fo(hq) map contoured at 4.5  $\sigma$  for all panels. Adjacent secondary  
308 structure elements are shown as transparent cartoon in white for R2b and black for NrdI. C) Rearrangement of  
309 the 40s loop of NrdI. Gly44 flips 180° in the hydroquinone state and forms a hydrogen bond with N5 of FMN  
310 (shown as dashed line). D) Rearrangements of side chains on the R2b facing side of FMN. Residues of NrdI are  
311 labelled in black, Ser196 from R2b in light grey. An unexplained density, larger than water, moves between the  
312 structures, named p-ox and p-hq and is marked as transparent big spheres; waters are represented as small  
313 opaque spheres. E) Same side chains as in D) are shown at a different angle facing the FMN. FMN is shown  
314 transparent in the background for clarity.

315 [Access to the metal site is not gated by FMN oxidation state, complex formation or](#)  
316 [manganese binding](#)

317

318 Both SFX *BcR2b-NrdI* structures display a di-manganese metal centre with similar  
319 coordination. In *BcR2b<sub>MnMn</sub>-NrdI<sub>ox</sub>* the two metal ions of R2b are refined at full occupancy and  
320 the coordination sphere is clearly defined in the electron density map (Fig. 4 A). Mn1 is 4-  
321 coordinated by His96, Glu93, Asp62 and Glu195. Mn2 is 5-coordinated by His198, Glu93,  
322 Glu195 and Glu161. Notably, Glu195 and Glu161 exhibit two alternative conformations each  
323 and alternately coordinate Mn2 in a monodentate or bidentate fashion. Importantly, while  
324 Glu195 bridges the two ions, Glu161 coordinates only Mn2. No coordinating waters could be  
325 identified (Fig. 4 B). The protein complex used in the crystallization for the *BcR2b<sub>MnMn</sub>-NrdI<sub>ox</sub>*  
326 dataset has not undergone any oxidation of the metal site and both manganese ions are in  
327 the Mn(II)/Mn(II) oxidation state (see Materials and Methods and Discussion for details).  
328 Notably, the reduction of FMN within NrdI occurs at about 16 Å from the metal site and does  
329 not affect the metal coordination in *BcR2b-NrdI* (Fig. 3 A). The Fo(ox)-Fo(hq) map shows  
330 slightly lower occupancy for both manganese ions in *BcR2b<sub>MnMn</sub>-NrdI<sub>hq</sub>* (Fig S5). The loss of

331 metals can be explained by the reduction treatment of the crystals for this dataset and Mn1  
332 was modelled with 80%, Mn2 with 90% occupancy in the reduced structure. Both structures  
333 show the same metal-metal distance of 3.8-3.9 Å within experimental error for this resolution  
334 (Fig. 4 B).

335

336 The metal-ligand Glu161 is likely a key player in the activation of the di-manganese centre as  
337 it is proposed to gate the access to the metal site for the oxidant produced by NrdI (Boal et  
338 al., 2010). Two main conformations have been observed for this ligand: In the “closed”  
339 conformation the glutamate interacts only with Mn2 and is proposed to prevent O<sub>2</sub><sup>•-</sup> from  
340 reaching the metal site by obstructing the channel. In the “open” conformation, on the other  
341 hand, Glu161 bridges both manganese ions leaving space for three water molecules to  
342 connect Mn2 to the water network in the channel between FMN and the metal site. The open  
343 conformation of the equivalent glutamate has been observed in structures of di-manganese  
344 R2b alone, e.g. from *B. cereus*, *E. coli* and *Streptococcus sanguinis* (PDB ID: 4BMU, 3N37,  
345 4N83) (Fig. 4 C) but also in the R2b-NrdI complex of *E. coli* (PDB ID: 3N3A) (Fig. 4 D) (Boal et  
346 al., 2010; Hammerstad et al., 2014; Makhlynets et al., 2014). Thus, NrdI binding to R2b is not  
347 responsible for triggering the open conformation of Glu161 (Glu158 in *E. coli* and Glu157 in *S.*  
348 *sanguinis*). It has been hypothesized that the presence of manganese ions in the active site  
349 could cause the glutamate to shift to the open conformation as the closed conformation is  
350 typically observed in R2b structures containing a di-iron site, e.g. in the *BcR2b<sub>FeFe</sub>*-NrdI  
351 complex (PDB ID: 4BMP) (Fig. 4 E) (Hammerstad et al., 2014). Indeed, since the di-iron form  
352 of R2b is oxidized by O<sub>2</sub> via a NrdI-independent pathway, the movement of the glutamate is  
353 not required for radical generation. However, our SFX *BcR2b<sub>MnMn</sub>*-NrdI structures harbour a  
354 di-manganese site and exhibit a Glu161 in the closed conformation, thereby demonstrating

355 that manganese in the active site is not sufficient to induce the glutamate shift. Finally, our  
 356 radiation damage free structures also show that the opening of the channel towards the metal  
 357 site is independent from the FMN oxidation state, as Glu161 is in the closed conformation  
 358 when di-manganese R2b is in complex with either NrdI<sub>ox</sub> or NrdI<sub>hq</sub> (Fig. 4 B). Altogether, our  
 359 data shows that the glutamate shift of Glu161 is not caused by the presence of manganese  
 360 ions, R2b-NrdI complex formation, a specific NrdI redox state or a combination of these  
 361 factors.

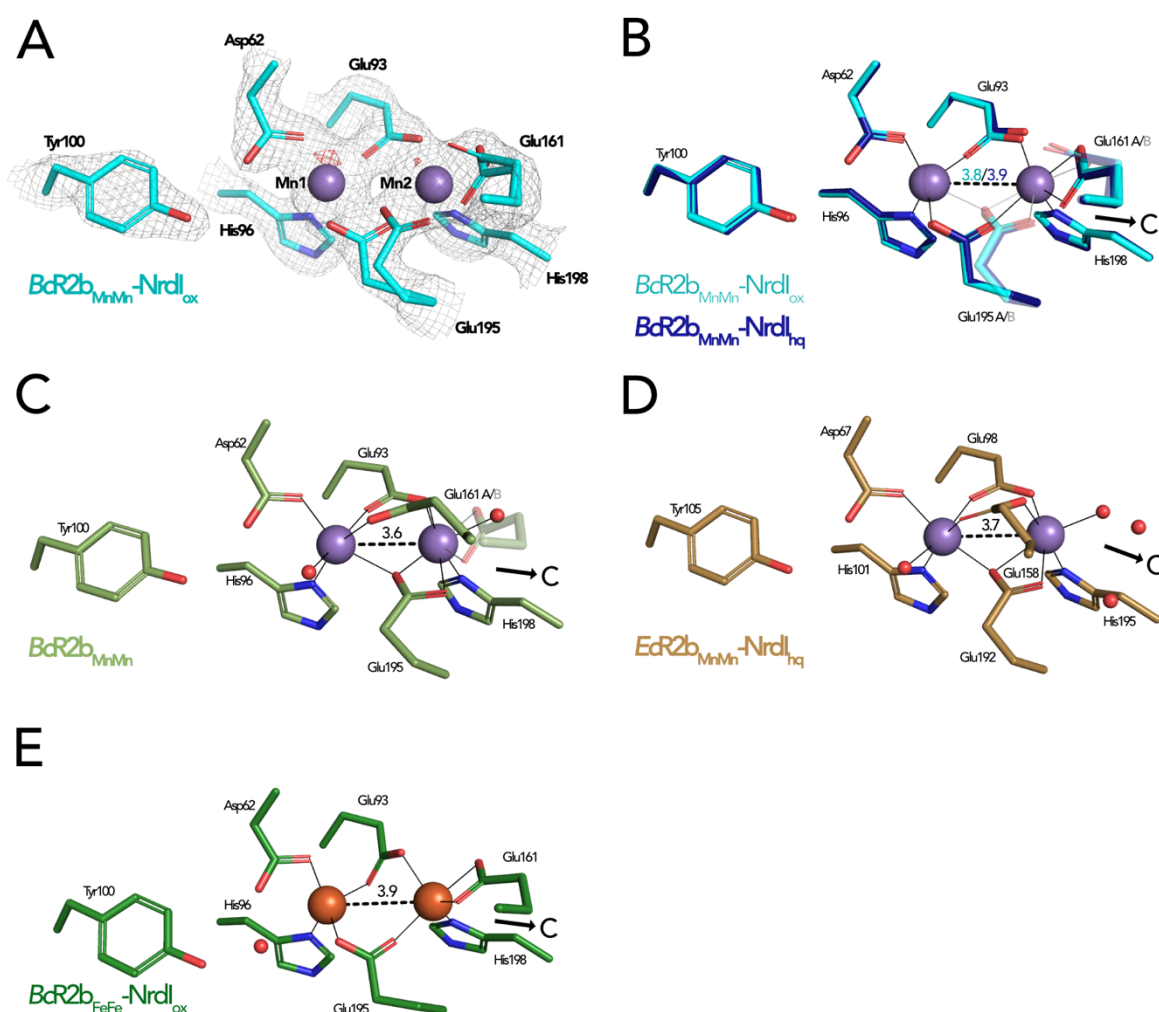

362  
 363 Figure 4 Comparison of active site architecture in different R2b structures including the radical harbouring  
 364 tyrosine. Manganese ions are shown as purple, iron ions as orange and waters as red spheres. The direction of  
 365 the connecting channel between R2b and NrdI is indicated by a black arrow and “C”. A) *BcR2b*<sub>MnMn</sub>-NrdI<sub>ox</sub> active  
 366 site. The 2Fo-Fc map is contoured at 2  $\sigma$  shown as grey mesh and Fo-Fc is contoured at 4  $\sigma$  with negative density

367 in red (no positive density is present). B) Superposition of *BcR2b*<sub>MnMn</sub>-NrdI<sub>hq</sub> and *BcR2b*<sub>MnMn</sub>-NrdI<sub>ox</sub>. The metal  
368 coordination is identical for both structures. C) Active site of *BcR2b*<sub>MnMn</sub> (PDB ID: 4BMU). The metal site of chain  
369 A is shown with Glu161 in both the open (opaque) and closed (transparent) conformation. D) Active site of  
370 *EcR2b*<sub>MnMn</sub>-NrdI<sub>hq</sub> (PDB ID: 3N3A). Glu158 is in the open conformation and two waters are in the position of the  
371 Glu161 of *BcR2b*. E) Active site of the di-iron *BcR2b*-NrdI complex (PDB ID: 4BMP). The metal coordination is  
372 similar to the manganese containing structures with Glu161 in the closed conformation. An additional water is  
373 hydrogen-bonded to Asp62 and Tyr100. Metal-metal distances are shown as dashed and metal ligands as solid  
374 lines; residues in alternative conformations are shown transparent for panels B)-E).

## 375 Discussion

376

377 In this study we present two structures of the manganese containing R2b-NrdI complex of  
378 *Bacillus cereus* with NrdI in two different oxidation states. These structures were obtained by  
379 room temperature SFX data collection using XFEL radiation in contrast to all previously  
380 studied R2b or NrdI structures, which were obtained by classical single-crystal synchrotron  
381 data collection at cryogenic temperatures. Determination of the oxidation state of redox  
382 active enzymes via synchrotron radiation is problematic because exposure to X-rays exerts  
383 photoreduction on redox centres. Investigation of artifact-free oxidized enzymes is therefore  
384 exceedingly challenging with synchrotron radiation. In the context of class Ib RNRs this affects  
385 both the redox active metal centre of R2b and FMN cofactor of NrdI. SFX eliminates the effects  
386 of photoreduction observed during synchrotron-based data collection. We describe SFX  
387 structures of the R2b-NrdI complex with NrdI in the oxidized and hydroquinone oxidation  
388 state. Both 2.0 Å structures are of similar quality as the previously published synchrotron  
389 structures of the same complex with a di-iron centre (Hammerstad et al., 2014) showing that  
390 the change of methodology does not affect the quality. This allowed detailed examination of  
391 structural reorganization induced by changes in FMN redox state. Notably, the FMN  
392 conformation *per se* changes little between the oxidized and hydroquinone oxidation state in  
393 R2b-NrdI. This is surprising since it was previously shown that FMN is bent in reduced NrdI  
394 when not bound to R2b. The complexation of R2b and NrdI thus prevents FMN bending and  
395 exerts strain on the isoalloxazine ring in the hydroquinone state. Other flavoproteins have  
396 been shown to tune the redox potential of FMN by forcing it into a specific binding angle  
397 (Senda et al., 2009; Walsh & Miller, 2003). A recent study by Sorigué et al. presented a SFX

398 structure of the flavoenzyme fatty acid photodecarboxylase (FAP) in complex with an oxidized  
399 flavin cofactor exhibiting a butterfly bending angle of  $14^\circ$  (Sorigué et al., 2021). Using time  
400 resolved SFX and complementary approaches, the study showed that during the enzymatic  
401 cycle of FAP the conformation of the flavin retains the butterfly bend in the different redox  
402 states. The authors conclude that the butterfly bend is enforced by the protein scaffold to  
403 promote flavin reduction. Following the same line of reasoning we propose that R2b binding  
404 to NrdI restricts FMN bending and thus, opposite to FAP, changes the FMN redox potential of  
405 the hydroquinone to favour FMN oxidation and reduction of molecular oxygen to superoxide  
406 (Scheme 3). This notion is supported by a study by Cotruvo et al. demonstrating that  
407 superoxide production by the *in vitro* R2b-NrdI<sub>hq</sub> complex of *Bacillus subtilis* is about 40 times  
408 faster than the production of superoxide by free NrdI<sub>hq</sub> under the same experimental  
409 conditions (Cotruvo et al., 2013). Controlling the superoxide production by complex formation  
410 could serve as a mechanism to protect the cell from production of superoxide by free NrdI.  
411 The binding of R2b may also facilitate access of O<sub>2</sub> to FMN by forming a hydrophobic binding  
412 pocket around the benzene ring of FMN. O<sub>2</sub> is reduced to superoxide at the C4a atom of the  
413 isoalloxazine ring of FMN and we observe a molecule bigger than a water bound about 5 Å  
414 away from the C4a atom in the oxidized R2b-NrdI complex. From the experimental setup it  
415 seems unlikely that the unidentified molecule is a superoxide ion because FMN never  
416 underwent a redox-cycle in this structure. However, refinement with a superoxide ion leaves  
417 little residual density, so the binding could fit a molecule of its size (Fig. S3). The density could  
418 thus represent a potential binding position of superoxide after its generation (Fig. S3). In  
419 addition, the density undergoes a redox-dependent switch of position moving further away  
420 from the reactive C4a (7 Å) towards the channel entrance in the reduced R2b-NrdI complex.  
421 This move is accompanied by a change of the putative coordination sphere. Importantly, in

422 both oxidized and reduced states, the unknown molecule is integrated into the conserved  
423 hydrogen-bonding network connecting FMN and the metal site and switches position with a  
424 water. Even though the exact nature of the observed electron density is unknown we  
425 conclude that the binding properties of these key positions are controlled by the FMN redox  
426 state and could mark the route superoxide would travel after being produced by the FMN.

427 Taken together, our results suggest that the production of superoxide by NrdI and the radical  
428 generation in R2b is elegantly orchestrated by the formation of the R2b-NrdI complex as well  
429 as redox state control of binding positions (Scheme 3). R2b-NrdI binding induces  
430 conformational strain in the flavin, lowering its redox potential and thus promoting  
431 superoxide generation. The interaction surface also provides binding positions that are  
432 controlled by the redox state of the flavin, presumably involved in gating of channel and metal  
433 site access.

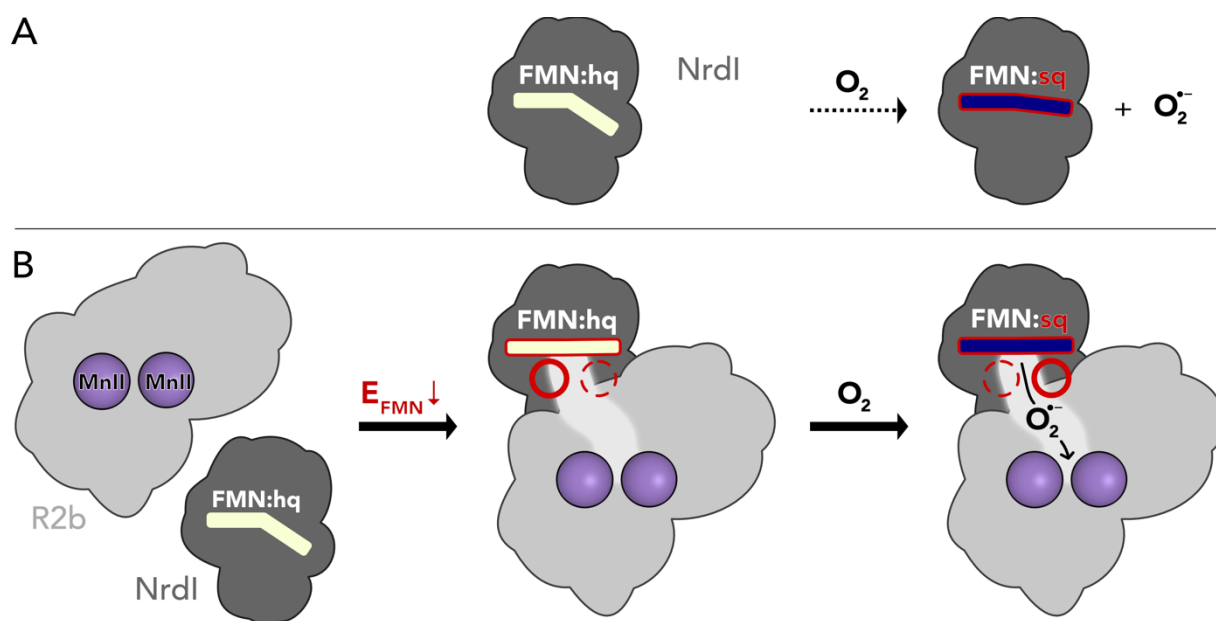

434

435 Scheme 3 **Proposed mechanism for the assembly of the R2b-NrdI complex.** A) Free NrdI<sub>hq</sub> and molecular oxygen  
436 react slowly to produce superoxide and NrdI<sub>sq</sub>. B) R2b and NrdI form a complex which imposes strain on the FMN  
437 bend and lowers its redox potential to favour oxygen reduction. The complex formation also generates a redox



438 state-controlled potential superoxide binding site close to the reactive carbon of FMN. Upon exposure to  
439 molecular oxygen, superoxide is generated in the complex and shuttled towards R2b.

## 440 Materials and Methods

441

### 442 Protein Expression

443 The plasmids containing the genes for both *BcR2b* (pET22b-*Bcr2b*) and *BcNrdI* (pET22b-  
444 *BcnrdI*) were kindly provided by Marta Hammerstad and Kristoffer Andersson (University of  
445 Oslo). The protein expression of *BcNrdI* was adapted from Røhr et al. (Røhr et al., 2010). *E.*  
446 *coli* BL21(DE3) (New England Biolabs, Frankfurt am Main, Germany) cells were transformed  
447 with the pET22b-*BcnrdI* plasmid. A preculture of Lysogeny Broth medium (Formedium,  
448 Norfolk, UK) was inoculated with a single colony, grown over night at 37 °C and 200 rpm. The  
449 next day large-scale cultures of 1.6 L Terrific Broth medium (Formedium) per glass bottle  
450 supplemented with 100 µg/ml carbenicillin (Alfa Aesar, Kandel, Germany) and 1:10000 v/v  
451 antifoam 204 (Merck, Darmstadt, Germany) were inoculated with 0.5% v/v of the preculture.  
452 The cells were incubated in a LEX bioreactor (Epiphyte3, Toronto, Canada) at 37 °C until an  
453 optical density at 600 nm of about 0.8 was reached. The cultures were cooled down to 20 °C,  
454 and the protein expression was induced with 0.8 mM isopropyl β-D-1-thiogalactopyranoside  
455 (IPTG) (Formedium). The cells, harvested after 12-16 hours of expression by centrifugation at  
456 4000 g for 20 minutes, formed a dark grey pellet. A volume of 1 L culture formed 12-19 g wet  
457 cell pellet. Expression of *BcR2b* was adapted from Tomter et al. (Tomter et al., 2008) and the  
458 protein was expressed in a similar way as *BcNrdI*. To express *BcR2b* metal-free,  
459 ethylenediaminetetraacetic acid (EDTA) (PanReac AppliChem, Darmstadt, Germany) was  
460 added to the large-scale cultures shortly before induction with IPTG to a final concentration  
461 of 1 mM. A volume of 1 L culture gave about 8 g wet cell pellet. The pellets were flash-frozen  
462 in liquid nitrogen and stored at -20 °C until further use.

463

## 464 Purification

465 **BcNrdI**: The purification of NrdI was adapted from Røhr et al (Røhr et al., 2010). About 20 g  
466 of bacterial cell pellet was resuspended in lysis buffer (100 mM Tris-HCl pH 7.5) supplemented  
467 with a tablet of EDTA-free cOmplete Protease Inhibitor S2 Cocktail Tablet (PIC) (Roche, Solna,  
468 Sweden) and DNase (PanReac Applichem) was added. Cells were lysed with a sonicator, Sonics  
469 VCX130 (Sonics, Newtown, CT), and the soluble fraction separated from cell debris by  
470 centrifugation at 40000 g for 30 minutes at 4 °C. The NrdI protein was precipitated by slow  
471 addition of ammonium sulphate (NH<sub>4</sub>SO<sub>4</sub>) to the lysate to a final concentration of 60 % w/v  
472 (0.37 g/ml) while stirring at 4°C. The precipitate was pelleted by centrifugation at 20000 g for  
473 20 minutes and 4°C and subsequently solubilised with a minimal volume of size exclusion  
474 chromatography (SEC) buffer (50 mM Tris pH 7.5). The protein was desalted by dialysis  
475 overnight at 4°C against dialysis buffer (10 mM Tris pH 7.5). The desalted protein was filtered  
476 through a 0.45 µm filter to remove precipitate and loaded onto a Q Sepharose High  
477 Performance 5 ml anion exchange column (Cytiva, Uppsala, Sweden), washed with SEC buffer  
478 and eluted with a gradient from 0-50% elution buffer (50 mM Tris-HCl pH 7.5, 1M KCl). The  
479 fractions containing the desired protein could be identified by the bright orange colour of  
480 NrdI (Fig. S1). Relevant fractions were pooled, concentrated with a Vivaspin 20 centrifugal  
481 concentrator with a 30,000 Da molecular weight cut-off polyethersulfone membrane  
482 (Vivaspin 30k concentrator) (Sartorius, Göttingen, Germany) and injected onto a HiLoad  
483 Superdex 75 prep grade size-exclusion column (Cytiva). Orange fractions were analysed for  
484 purity by sodium dodecyl sulphate–polyacrylamide gel electrophoresis (SDS-PAGE) and  
485 fractions with a 95% or higher purity were pooled. The theoretical molecular weight of NrdI  
486 was calculated to be 13449 Da with ProtParam (Gasteiger et al., 2005) and the extinction

487 coefficient  $\epsilon_{447} = 10.8 \text{ mM}^{-1} \text{ cm}^{-1}$  (Berggren et al., 2014) was used to determine the protein  
488 concentration using UV-vis spectroscopy. The protein was concentrated to 25 mg/ml, flash  
489 frozen in liquid nitrogen and stored at  $-80 \text{ }^{\circ}\text{C}$  until further use.

490

491 **BcR2b:** The R2b purification protocol was adapted from Tomter et al. (Tomter et al., 2008).

492 The protein was produced metal free; for that purpose, EDTA was included in the lysis buffer

493 to inhibit metal uptake. About 20 g of bacterial cell pellet was resuspended in lysis buffer (100

494 mM Tris-HCl pH 7.5, 1 mM EDTA) with a tablet of PIC and lysed by sonication. Streptomycin

495 sulphate was added to a total of 2.5% w/v and incubated for 10 minutes at  $20^{\circ} \text{C}$  for DNA

496 precipitation. The crude lysate was cleared by centrifugation for 30 min at 40000 g. The

497 supernatant was cleared from contaminants by adding 40 % (0.24 g/ml)  $\text{NH}_4\text{SO}_4$  at  $20^{\circ}\text{C}$

498 followed by centrifugation at 20000 g for 20 minutes. The  $\text{NH}_4\text{SO}_4$  concentration for the

499 remaining supernatant was increased to 50 % (0.31 g/ml) at  $20^{\circ}$  to precipitate R2b. After the

500 second centrifugation at 20000g for 20 minutes the pellet was dissolved with a minimal

501 volume of lysis buffer. The protein was diluted 4x with buffer A (50 mM Tris pH 7.5, 1.5 M

502  $\text{NH}_4\text{SO}_4$ ) to increase the salt concentration sufficiently. The diluted protein was filtered

503 through a  $0.45 \text{ }\mu\text{m}$  membrane filter and loaded onto a column packed with 20 ml Phenyl

504 Sepharose High Performance resin (Cytiva). The protein was washed with buffer A and eluted

505 with a gradient with SEC buffer (50 mM Tris pH 7.5). Several column volumes were needed to

506 elute the protein. The elution fractions were analysed by SDS-PAGE. Protein containing

507 fractions were pooled, concentrated by a Vivaspin 50k concentrator and injected onto a

508 HiLoad Superdex 200 prep grade column (Cytiva). Elution fractions were analysed by SDS-

509 PAGE and pure fractions pooled. The theoretical molecular weight and the extinction co-

510 efficient of R2b were calculated with ProtParam to be 37017 Da and  $\epsilon_{280} = 48.36 \text{ mM}^{-1} \text{ cm}^{-1}$

511 respectively (Gasteiger et al., 2005). R2b was concentrated to 50 mg/ml with a Vivaspin 50kDa  
512 concentrator, flash frozen and stored at -80 °C until further use. A total of 20 g bacterial cell  
513 pellet yielded about 100-150 mg pure protein.

514

#### 515 [Quantification of R2b metal content with TXRF](#)

516 To control the metal content of *BcR2b* the protein was measured with total reflection x-ray  
517 fluorescence spectroscopy (TXRF) using a Bruker PicoFox S2 spectrometer (Bruker, Billerica,  
518 MA). Three independently prepared replicates of the concentrated protein at 1.7 mM were  
519 mixed 1:1 with a gallium standard at 20 mg/l and dried on top of a siliconized quartz sample  
520 carrier. The discs were individually measured before use to avoid external contamination of  
521 the sample. The results were analysed with the Bruker Spectra software version 7.8.2.0  
522 provided with the instrument.

523

#### 524 [Crystallization of the \*BcR2b\*-NrdI complex](#)

525 The *BcR2b*-NrdI protein complex was prepared for crystallization as follows: 0.25 mM *BcR2b*  
526 in 50 mM Tris-HCl pH 7.5 was incubated with 12 molar equivalents of MnCl<sub>2</sub> for 10 minutes  
527 at 20° C, then 0.25 mM *BcNrdI* was added and the mixture incubated for another 15 minutes  
528 at 20° C to ensure complex formation. New crystallization conditions were screened since the  
529 crystallization condition published in (Hammerstad et al., 2014) could not be reproduced.  
530 Initial hits in conditions C5 of the JSCG+ crystallisation screen (0.1 M Sodium Hepes pH 7.5,  
531 0.8 M Sodium phosphate monobasic monohydrate, 0.8 M Potassium phosphate monobasic)  
532 and the A7 condition of the PACT premier crystallization screen (0.1 M Sodium acetate pH  
533 5.0, 0.2 M NaCl, 20 % w/v PEG 6000) (both Molecular Dimensions, Sheffield, UK) were further  
534 optimized to yield crystals between 10 µm and 50 µm in the longest axis (Fig. S1). The final

535 crystallization protocol was established as described: Crystals spontaneously grew in a  
536 hanging drop vapour diffusion experiment after one to two days at 20°C. Crystallization  
537 condition A (0.1 M HEPES pH 7.0, 0.6-0.85 M sodium phosphate monobasic monohydrate,  
538 0.6-0.85 M potassium phosphate monobasic) was manually mixed with the protein complex  
539 solution in a ratio of 1:1 (1  $\mu$ l + 1  $\mu$ l). The crystals grown in this experiment were used to  
540 produce microseeds for crystallization with the batch method. Two crystal containing drops  
541 were transferred into 50  $\mu$ l of crystallization condition A in the bottom of a 1.5 ml  
542 microcentrifuge tube. A seed bead (Saint Gobain, Aachen, Germany) was placed into the  
543 solution, the crystal crushed by vigorous shaking and the mixture used as seed stock for the  
544 following crystallization experiments. Batch crystallization was set up in PCR tubes at 20 °C. A  
545 volume of 40  $\mu$ l of crystallization condition B (0.1 M MnCl<sub>2</sub>, 0.1 M sodium acetate 5.0, 5% PEG  
546 6000) were pipetted on top of 40  $\mu$ l of protein complex solution. A volume of 8  $\mu$ l of microseed  
547 solution was added to the tube and everything mixed by pipetting. Orange rhombohedron  
548 shaped crystals typically sized between 20 and 50  $\mu$ m in the longest axis grew over night,  
549 forming an orange pellet at the bottom of the tubes. The crystals were resuspended and  
550 pooled in 2 ml microcentrifuge tubes (Fig. S1). Crystals used to collect the dataset for  
551 *BcR2b<sub>MnMn</sub>-NrdI<sub>ox</sub>* could be directly loaded into a Gastight SampleLock (Hamilton, Bonaduz,  
552 Switzerland) syringe for sample delivery. The crystals used for the *BcR2b<sub>MnMn</sub>-NrdI<sub>hq</sub>* dataset  
553 had to be chemically reduced first as described below.

554

### 555 [Reduction protocol](#)

556 Crystals for the *BcR2b<sub>MnMn</sub>-NrdI<sub>hq</sub>* dataset were chemically reduced before data collection. All  
557 following steps were conducted in an anaerobic glove box with O<sub>2</sub> below 10 ppm at room  
558 temperature. A volume of 900  $\mu$ l of pooled crystal slurry was gently centrifuged, forming a

559 dense crystal pellet. Of the supernatant 800  $\mu$ l were carefully removed, collected separately  
560 and supplemented with 18  $\mu$ l of freshly prepared, anaerobic 1 M sodium dithionite (DT). The  
561 DT-containing supernatant was gently mixed with the crystal pellet (final DT concentration of  
562 20 mM) and the colour change of the crystals from a bright orange to a faint, light yellow was  
563 observed in a matter of minutes. The DT was subsequently washed out by gently spinning  
564 down the crystals, removing the supernatant without disturbing the crystal pellet, replacing  
565 it with anaerobic wash buffer (100 mM MnCl<sub>2</sub>, 50 mM sodium acetate pH 5.0, 2.5% (w/v) PEG  
566 6000, 10% (v/v) glycerol) and gently resuspending the crystals. This washing step was  
567 repeated 3 times, adding wash buffer in the last step to a volume of 800  $\mu$ l. The final  
568 concentration of DT in the crystal slurry was below 4  $\mu$ M. All of the crystal slurry was loaded  
569 into a 1 ml gastight SampleLock Hamilton syringe and stored in the anaerobic box until sample  
570 injection.

571

## 572 Data collection

573 The *BcR2b-NrdI* crystals were initially tested for stability and diffraction quality at SACLA in  
574 Japan during experiment 2017B8085. The sample was delivered with a grease extruder setup  
575 installed on site (Sugahara et al., 2015; Tono et al., 2013). Hydroxyethyl cellulose matrix  
576 (Sugahara et al., 2017) and the protein crystals were mixed together in a volume ratio matrix  
577 to crystal pellet of 9:1 and the mixture ejected with a HPLC pump through a 150  $\mu$ m nozzle  
578 with a flow rate of 1-1.5  $\mu$ l/min, delivering the sample into the XFEL beam. X-rays were  
579 delivered as <10 fs long pulses at 10.9 keV with 30 Hz repetition rate and a typical pulse energy  
580 of around 0.32 mJ with a beam size of 2 x 2  $\mu$ m<sup>2</sup> (fwhm). The diffraction of the sample was  
581 recorded 100 mm downstream of the interaction point on an Octal MPCCD detector. The

582 initial data collection showed stability of the crystals over days and a diffraction quality to  
583 about 2 Å.

584 The datasets used in this paper were collected at LCLS, California during experiment LU50. X-  
585 ray pulses at 9.5 keV with a pulse energy of 4 mJ, 30 Hz repetition rate and a duration of  
586 around 35 fs were generated and used for X-ray diffraction in the macromolecular  
587 femtosecond crystallography (MFX) experimental hutch (Sierra et al., 2019); the diffraction  
588 was recorded on a Rayonix MX340 (Rayonix L.L.C, Evanston, USA) detector. The sample was  
589 delivered into the X-ray interaction point with the drop-on-tape method; the detailed method  
590 was described by Fuller et. al (Fuller et al., 2017). Briefly, crystal slurry in a 1 ml SampleLock  
591 syringe was pumped with a syringe pump (KD scientific, Holliston, MA) at a flow rate of 8-9  
592 µl/min through a silica capillary into a 6 µl sample reservoir. An acoustic transducer  
593 transferred crystal containing droplets of 2.5-4 nl volume onto a Kapton tape, which  
594 transported the droplets into the X-ray beam at 28° C and 27% relative humidity with a speed  
595 of 300 mm/s, which resulted in the crystals being exposed to the He-environment for about  
596 0.8 s. The enclosure of the setup was filled with a He-atmosphere with an O<sub>2</sub> level below 0.1  
597 % for the *BcR2b<sub>MnMn</sub>-Nrd<sub>hq</sub>* data collection.

598

### 599 Processing, Structure Determination and Refinement

600 The datasets for *BcR2b<sub>MnMn</sub>-Nrd<sub>hq</sub>* and *BcR2b<sub>MnMn</sub>-Nrd<sub>ox</sub>* were processed with cctbx.xfel  
601 (Brewster, Young, et al., 2019; Hattne et al., 2014; Sauter, 2015) and DIALS (Brewster et al.,  
602 2018; Winter et al., 2018). We performed joint refinement of the crystal models against the  
603 detector position for each batch to account for small time-dependent variations in detector  
604 position and also corrected for the Kapton tape shadow (Fuller et al., 2017). Data was scaled  
605 and merged to 2.0 Å resolution using cctbx.xfel.merge with errors determined by the ev11



606 method (Brewster, Bhowmick, et al., 2019) based on  $CC_{1/2}$  and multiplicity values and on R-  
607 factors after initial refinement. Data statistics are available in Table 1. Both structures were  
608 solved by molecular replacement and refined independently with the PHENIX Suite  
609 (Liebschner et al., 2019). The phases were solved with phenix.phaser (McCoy et al., 2007). A  
610 *BcR2b-NrdI* complex structure (PDB ID: 4BMO (Hammerstad et al., 2014)) was modified by  
611 manually removing waters and alternate conformations and used as a starting model. The  
612 suggested solutions were in the same space group ( $C222_1$ ) as the starting model with similar  
613 unit cell dimensions (Table 1) with one complex in the asymmetric unit. The  $R_{free}$  set of the  
614 4BMO model corresponding to 5% of reflections was assigned to all datasets with  
615 phenix.reflection\_tools. Restraints of the entry “FMN” of the ligand database provided by  
616 phenix were used for the oxidized FMN in *BcR2b<sub>MnMn</sub>-NrdI<sub>ox</sub>*. Restraints for the hydroquinone  
617 FMN in *BcR2b<sub>MnMn</sub>-NrdI<sub>hq</sub>* were generated with phenix.eLBOW (Moriarty et al., 2009). The  
618 datasets were iteratively refined with phenix.refine (Afonine et al., 2012), examined and built  
619 in coot (Emsley et al., 2010) and validated with MolProbity (Williams et al., 2018). Refinement  
620 of all atoms included isotropic B-factors, TLS parameters, occupancy and reciprocal space  
621 refinement with a high-resolution cut off of 2.0 Å. Waters were initially added using  
622 phenix.refine and in later refinements corrected manually. The metal occupancy for the  
623 reduced structure was fixed manually after several cycles of refinement. An overview over  
624 refinement and model quality statistics can be found in Table 1, created with  
625 phenix.table\_one. The refined structures were compared and RMSD values calculated with  
626 SSM superimpose (Krissinel & Henrick, 2004).

## 627 **Figures**

628 Molecular figures were prepared with the PyMOL Molecular Graphics System, Version 2.4.2  
629 Schrödinger, LLC. Scheme 2 was designed with ChemDraw (PerkinElmer Informatics). The bar

630 graph in Fig. 3 A was generated with GraphPad Prism, Version 9.2.0 for iOS (GraphPad  
631 Software, San Diego, California USA). All figures and schemes except Scheme 2 were designed  
632 and assembled in Affinity Designer (Serif (Europe) Ltd, Nottingham, UK)

## 633 Acknowledgements

634

635 We thank Robert Bolotovskiy, Iris D. Young and Lee J. O’Riordan for help with data processing  
636 and the staff at LCLS and SACLA. We thank Kristine Gråve for input and helpful discussions  
637 during data analysis and manuscript writing.

638 This work was supported by the Swedish Research Council (2017-04018 and 2021-03992 to  
639 M.H.), the European Research Council (HIGH-GEAR 724394 to M.H.), the Knut and Alice  
640 Wallenberg Foundation (20217.0275 and 2019.0436 to M.H.), and National Institutes of  
641 Health grants GM133081 (to K.D.S.), GM117126 (to N.K.S.), GM55302 (to V.K.Y.), GM110501  
642 (to J.Y.) and GM126289 (to J.K.). A.M.O., P.A., and A.Bu. were supported by Diamond Light  
643 Source, the UK Science and Technology Facilities Council (STFC), a jointly funded strategic  
644 award from the Wellcome Trust and the Biotechnology and Biological Sciences Research  
645 Council (102593 to James Naismith), a Wellcome Investigator Award (210734/Z/18/Z to  
646 A.M.O.), and a Royal Society Wolfson Fellowship (RSWF\R2\182017 to A.M.O.). The DOT  
647 instrument used in this research was funded by Department of Energy (DOE), Office of  
648 Science, Office of Basic Energy Sciences (BES), Division of Chemical Sciences, Geosciences, and  
649 Biosciences (to J.K., J.Y., and V.K.Y.). XFEL data was collected under proposal LU50 at LCLS,  
650 SLAC, Stanford, USA, and under proposal 2017B8085 at BL2 of SACLA, Japan. The Rayonix  
651 detector used at LCLS was supported by the NIH grant S10 OD023453. Use of the LCLS, SLAC  
652 National Accelerator Laboratory, is supported by the U.S. DOE, Office of Science, BES, under  
653 contract no. DE-AC02-76SF00515.

654

## 655 Author Contributions

656 J.J., H.L., V.S., O.A. and M.H. developed the study

657 C.P., I-S.K., S.G., P.S.S., A.M.O., F.D.F., and J.K. developed, tested and ran the sample delivery  
658 system

659 A.S.B., M.D., K.D.S., A.Bh., A.Bu., and N.K.S. processed and analysed XFEL data

660 F.D.F., A.Ba. operated the MFX instrument

661 J.J., H.L., O.A., M.H., C.P., I-S.K., A.S.B., S.G., K.D.S., A.Bh., P.S.S., A.Bu., P.A., A.M.O., F.D.F.,

662 A.Ba., N.K.S., V.K.Y., J.Y., J.K. performed the LCLS experiment

663 V.S., H.L., P.A., F.D.F., M.H., M.H.C., A.M.O., S.O., K.T., V.K.Y., J.K., J.Y. performed the SACLA

664 experiment

665 J.J. and H.L. produced and purified proteins and developed the crystallization protocol

666 J.J. refined, analysed and interpreted the data and wrote the manuscript with input from all

667 authors

668 H.L. and M.H. supervised, edited and revised the manuscript

669

#### 670 **Competing interests**

671 The authors declare no competing interests.

672

#### 673 **Data availability**

674 The atomic coordinates and crystallographic data have been deposited in the Protein Data

675 Bank (<https://www.pdb.org/>) under the following accession codes: *BcR2b<sub>MnMn</sub>-NrdI<sub>ox</sub>*: 7Z3D;

676 *BcR2b<sub>MnMn</sub>-NrdI<sub>hq</sub>*: 7Z3E.

## 677 References:

- 678  
679 Afonine, P. V., Grosse-Kunstleve, R. W., Echols, N., Headd, J. J., Moriarty, N. W., Mustyakimov, M., Terwilliger,  
680 T. C., Urzhumtsev, A., Zwart, P. H., & Adams, P. D. (2012). Towards automated crystallographic structure  
681 refinement with phenix.refine. *Acta Crystallographica Section D: Biological Crystallography*, 68(4), 352–  
682 367. <https://doi.org/10.1107/S0907444912001308>
- 683 Berggren, G., Duraffourg, N., Sahlin, M., & Sjöberg, B. M. (2014). Semiquinone-induced maturation of bacillus  
684 anthracis ribonucleotide reductase by a superoxide intermediate. *Journal of Biological Chemistry*,  
685 289(46), P31940-31949. <https://doi.org/10.1074/jbc.M114.592535>
- 686 Blaesi, E. J., Palowitch, G. M., Hu, K., Kim, A. J., Rose, H. R., Alapati, R., Lougee, M. G., Kim, H. J., Taguchi, A. T.,  
687 Tan, K. O., Laremore, T. N., Griffin, R. G., Krebs, C., Matthews, M. L., Silakov, A., Bollinger, J. M., Allen, B.  
688 D., & Boal, A. K. (2018). Metal-free class Ib ribonucleotide reductase from pathogens initiates catalysis  
689 with a tyrosine-derived dihydroxyphenylalanine radical. *Proceedings of the National Academy of Sciences*  
690 *of the United States of America*, 115(40), 10022–10027. <https://doi.org/10.1073/pnas.1811993115>
- 691 Boal, A. K., Cotruvo, J. A., Stubbe, J. A., & Rosenzweig, A. C. (2010). Structural basis for activation of class Ib  
692 ribonucleotide reductase. *Science*, 329(5998), 1526–1530. <https://doi.org/10.1126/science.1190187>
- 693 Brewster, A. S., Bhowmick, A., Bolotovskoy, R., Mendez, D., Zwart, P. H., & Sauter, N. K. (2019). SAD phasing of  
694 XFEL data depends critically on the error model. *Urn:Issn:2059-7983*, 75(11), 959–968.  
695 <https://doi.org/10.1107/S2059798319012877>
- 696 Brewster, A. S., Waterman, D. G., Parkhurst, J. M., Gildea, R. J., Young, I. D., O’Riordan, L. J., Yano, J., Winter,  
697 G., Evans, G., & Sauter, N. K. (2018). Improving signal strength in serial crystallography with DIALS  
698 geometry refinement. *Acta Crystallographica. Section D, Structural Biology*, 74(Pt 9), 877–894.  
699 <https://doi.org/10.1107/S2059798318009191>
- 700 Brewster, A. S., Young, I. D., Lyubimov, A., Bhowmick, A., & Sauter, N. K. (2019). Processing serial  
701 crystallographic data from XFELs or synchrotrons using the cctbx.xfel GUI. *Computational Crystallography*  
702 *Newsletter*, 10, 22–39.
- 703 Carugo, O. (2014). Buried chloride stereochemistry in the protein data bank. *BMC Structural Biology*, 14(1), 1–  
704 7. <https://doi.org/10.1186/s12900-014-0019-8>
- 705 Cotruvo, J. A., Stich, T. A., Britt, R. D., & Stubbe, J. (2013). Mechanism of assembly of the dimanganese-tyrosyl  
706 radical cofactor of class Ib ribonucleotide reductase: Enzymatic generation of superoxide is required for  
707 tyrosine oxidation via a Mn(III)Mn(IV) intermediate. *Journal of the American Chemical Society*, 135(10),  
708 4027–4039. <https://doi.org/10.1021/ja312457t>
- 709 Cotruvo, J. A., & Stubbe, J. (2008). NrdI, a flavodoxin involved in maintenance of the diferric-tyrosyl radical  
710 cofactor in Escherichia coli class Ib ribonucleotide reductase. *Proceedings of the National Academy of*  
711 *Sciences of the United States of America*, 105(38), 14383–14388.  
712 <https://doi.org/10.1073/pnas.0807348105>
- 713 Cotruvo, J. A., & Stubbe, J. (2010). An active dimanganese(III)-tyrosyl radical cofactor in Escherichia coli class Ib  
714 ribonucleotide reductase. *Biochemistry*, 49(6), 1297–1309. <https://doi.org/10.1021/bi902106n>
- 715 Cox, N., Ogata, H., Stolle, P., Reijerse, E., Auling, G., & Lubitz, W. (2010). A Tyrosyl-Dimanganese Coupled Spin  
716 System is the Native Metalloradical Cofactor of the R2F Subunit of the Ribonucleotide Reductase of  
717 Corynebacterium ammoniagenes. *Journal of the American Chemical Society*, 132(32), 11197–11213.  
718 <https://doi.org/10.1021/ja1036995>
- 719 Doerr, A. (2011). Diffraction before destruction. In *Nature Methods* (Vol. 8, Issue 4, p. 283).  
720 <https://doi.org/10.1038/nmeth0411-283>
- 721 Emsley, P., Lohkamp, B., Scott, W. G., & Cowtan, K. (2010). Features and development of Coot. *Acta*  
722 *Crystallographica. Section D, Biological Crystallography*, 66(Pt 4), 486–501.  
723 <https://doi.org/10.1107/S0907444910007493>
- 724 Fuller, F. D., Gul, S., Chatterjee, R., Burgie, E. S., Young, I. D., Lebrette, H., Srinivas, V., Brewster, A. S., Michels-  
725 Clark, T., Clinger, J. A., Andi, B., Ibrahim, M., Pastor, E., de Lichtenberg, C., Hussein, R., Pollock, C. J.,  
726 Zhang, M., Stan, C. A., Kroll, T., ... Yano, J. (2017). Drop-on-demand sample delivery for studying  
727 biocatalysts in action at X-ray free-electron lasers. *Nature Methods*, 14(4), 443–449.  
728 <https://doi.org/10.1038/nmeth.4195>
- 729 Gasteiger, E., Hoogland, C., Gattiker, A., Duvaud, S., Wilkins, M. R., Appel, R. D., & Bairoch, A. (2005). Protein  
730 Identification and Analysis Tools on the ExpASY Server. In *The Proteomics Protocols Handbook* (pp. 571–  
731 607). Humana Press. <https://doi.org/10.1385/1-59259-890-0:571>
- 732 Ghisla, S., & Massey, V. (1989). Mechanisms of flavoprotein-catalyzed reactions. *European Journal of*

- 733 *Biochemistry*, 181(1), 1–17. <https://doi.org/10.1111/J.1432-1033.1989.TB14688.X>
- 734 Gråve, K., Lambert, W., Berggren, G., Griese, J. J., Bennett, M. D., Logan, D. T., & Högbom, M. (2019). Redox-  
735 induced structural changes in the di-iron and di-manganese forms of Bacillus anthracis ribonucleotide  
736 reductase subunit NrdF suggest a mechanism for gating of radical access. *Journal of Biological Inorganic  
737 Chemistry*, 24(6), 849–861. <https://doi.org/10.1007/s00775-019-01703-z>
- 738 Hammerstad, M., Hersleth, H. P., Tomter, A. B., Røhr, Å. K., & Andersson, K. K. (2014). Crystal structure of  
739 Bacillus cereus class Ib ribonucleotide reductase di-iron NrdF in complex with NrdI. *ACS Chemical  
740 Biology*, 9(2), 526–537. <https://doi.org/10.1021/cb400757h>
- 741 Hattne, J., Echols, N., Tran, R., Kern, J., Gildea, R. J., Brewster, A. S., Alonso-Mori, R., Glöckner, C., Hellmich, J.,  
742 Laksmono, H., Sierra, R. G., Lassalle-Kaiser, B., Lampe, A., Han, G., Gul, S., DiFiore, D., Milathianaki, D.,  
743 Fry, A. R., Miahnahri, A., ... Sauter, N. K. (2014). Accurate macromolecular structures using minimal  
744 measurements from X-ray free-electron lasers. *Nature Methods* 2014 11:5, 11(5), 545–548.  
745 <https://doi.org/10.1038/nmeth.2887>
- 746 Högbom, M., Sjöberg, B., & Berggren, G. (2020). Radical Enzymes. In *eLS* (Vol. 1, pp. 375–393). Wiley.  
747 <https://doi.org/10.1002/9780470015902.a0029205>
- 748 Huque, Y., Fieschi, F., Torrents, E., Gibert, I., Eliasson, R., Reichard, P., Sahlin, M., & Sjöberg, B. M. (2000). The  
749 active form of the R2F protein of class Ib ribonucleotide reductase from Corynebacterium  
750 ammoniagenes is a diferric protein. *Journal of Biological Chemistry*, 275(33), 25365–25371.  
751 <https://doi.org/10.1074/jbc.M002751200>
- 752 Johansson, R., Torrents, E., Lundin, D., Sprenger, J., Sahlin, M., Sjöberg, B. M., & Logan, D. T. (2010). High-  
753 resolution crystal structures of the flavoprotein NrdI in oxidized and reduced states - An unusual  
754 flavodoxin: Structural biology. *FEBS Journal*, 277(20), 4265–4277. <https://doi.org/10.1111/j.1742-4658.2010.07815.x>
- 755 Krissinel, E., & Henrick, K. (2004). Secondary-structure matching (SSM), a new tool for fast protein structure  
756 alignment in three dimensions. *Acta Crystallographica. Section D, Biological Crystallography*, 60(Pt 12 Pt  
757 1), 2256–2268. <https://doi.org/10.1107/S0907444904026460>
- 758 Liebschner, D., Afonine, P. V., Baker, M. L., Bunkoczi, G., Chen, V. B., Croll, T. I., Hintze, B., Hung, L. W., Jain, S.,  
759 McCoy, A. J., Moriarty, N. W., Oeffner, R. D., Poon, B. K., Prisant, M. G., Read, R. J., Richardson, J. S.,  
760 Richardson, D. C., Sammito, M. D., Sobolev, O. V., ... Adams, P. D. (2019). Macromolecular structure  
761 determination using X-rays, neutrons and electrons: Recent developments in Phenix. *Acta  
762 Crystallographica Section D: Structural Biology*, 75(10), 861–877.  
763 <https://doi.org/10.1107/S2059798319011471>
- 764 Makhlynets, O., Boal, A. K., Rhodes, D. L. V., Kitten, T., Rosenzweig, A. C., & Stubbe, J. A. (2014). Streptococcus  
765 sanguinis class Ib ribonucleotide reductase: High activity with both iron and manganese cofactors and  
766 structural insights. *Journal of Biological Chemistry*, 289(9), 6259–6272.  
767 <https://doi.org/10.1074/jbc.M113.533554>
- 768 McCoy, A. J., Grosse-Kunstleve, R. W., Adams, P. D., Winn, M. D., Storoni, L. C., & Read, R. J. (2007). Phaser  
769 crystallographic software. *Journal of Applied Crystallography*, 40(4), 658–674.  
770 <https://doi.org/10.1107/S0021889807021206>
- 771 Moriarty, N. W., Grosse-Kunstleve, R. W., & Adams, P. D. (2009). electronic Ligand Builder and Optimization  
772 Workbench (eLBOW): a tool for ligand coordinate and restraint generation. *Urn:Issn:0907-4449*, 65(10),  
773 1074–1080. <https://doi.org/10.1107/S0907444909029436>
- 774 Nass, K. (2019). Radiation damage in protein crystallography at X-ray free-electron lasers. *Urn:Issn:2059-7983*,  
775 75(2), 211–218. <https://doi.org/10.1107/S2059798319000317>
- 776 Neutze, R., Wouts, R., Van Der Spoel, D., Weckert, E., & Hajdu, J. (2000). Potential for biomolecular imaging  
777 with femtosecond X-ray pulses. *Nature*, 406(6797), 752–757. <https://doi.org/10.1038/35021099>
- 778 Nordlund, P., & Reichard, P. (2006). Ribonucleotide reductases. *Annual Review of Biochemistry*, 75(1), 681–  
779 706. <https://doi.org/10.1146/annurev.biochem.75.103004.142443>
- 780 Roca, I., Torrents, E., Sahlin, M., Gibert, I., & Sjöberg, B.-M. M. (2008). NrdI Essentiality for Class Ib  
781 Ribonucleotide Reduction in Streptococcus pyogenes. *Journal of Bacteriology*, 190(14), 4849–4858.  
782 <https://doi.org/10.1128/JB.00185-08>
- 783 Røhr, Å. K., Hersleth, H.-P. P., Kristoffer Andersson, K., & Andersson, K. K. (2010). Tracking flavin conformations  
784 in protein crystal structures with raman spectroscopy and QM/MM calculations. *Angewandte Chemie -  
785 International Edition*, 49(13), 2324–2327. <https://doi.org/10.1002/anie.200907143>
- 786 Rould, M. A., & Carter, C. W. (2003). Isomorphous Difference Methods. *Methods in Enzymology*, 374, 145–163.  
787 [https://doi.org/10.1016/S0076-6879\(03\)74007-5](https://doi.org/10.1016/S0076-6879(03)74007-5)
- 788 Sauter, N. K. (2015). XFEL diffraction: developing processing methods to optimize data quality. *Journal of*  
789

- 790 *Synchrotron Radiation*, 22(2), 239–248. <https://doi.org/10.1107/S1600577514028203>
- 791 Senda, T., Senda, M., Kimura, S., & Ishida, T. (2009). Redox control of protein conformation in flavoproteins. In
- 792 *Antioxidants and Redox Signaling* (Vol. 11, Issue 7, pp. 1741–1766). Antioxid Redox Signal.
- 793 <https://doi.org/10.1089/ars.2008.2348>
- 794 Sierra, R. G., Batyuk, A., Sun, Z., Aquila, A., Hunter, M. S., Lane, T. J., Liang, M., Yoon, C. H., Alonso-Mori, R.,
- 795 Armenta, R., Castagna, J.-C., Hollenbeck, M., Osier, T. O., Hayes, M., Aldrich, J., Curtis, R., Koglin, J. E.,
- 796 Rendahl, T., Rodriguez, E., ... IUCr. (2019). The Macromolecular Femtosecond Crystallography Instrument
- 797 at the Linac Coherent Light Source. *Urn:Issn:1600-5775*, 26(2), 346–357.
- 798 <https://doi.org/10.1107/S1600577519001577>
- 799 Sorigué, D., Hadjidemetriou, K., Blangy, S., Gotthard, G., Bonvalet, A., Coquelle, N., Samire, P., Aleksandrov, A.,
- 800 Antonucci, L., Benachir, A., Boutet, S., Byrdin, M., Cammarata, M., Carbajo, S., Cuiné, S., Doak, R. B.,
- 801 Foucar, L., Gorel, A., Grünbein, M., ... Beisson, F. (2021). Mechanism and dynamics of fatty acid
- 802 photodecarboxylase. *Science*, 372(6538). <https://doi.org/10.1126/science.abd5687>
- 803 Spence, J. C. H. (2017). XFELs for structure and dynamics in biology. *IUCrJ*, 4(Pt 4), 322.
- 804 <https://doi.org/10.1107/S2052252517005760>
- 805 Srinivas, V., Lebrette, H., Lundin, D., Kutin, Y., Sahlin, M., Lerche, M., Eirich, J., Branca, R. M. M., Cox, N.,
- 806 Sjöberg, B. M., & Högbom, M. (2018). Metal-free ribonucleotide reduction powered by a DOPA radical in
- 807 *Mycoplasma* pathogens. *Nature*, 563(7731), 416–420. <https://doi.org/10.1038/s41586-018-0653-6>
- 808 Sugahara, M., Mizohata, E., Nango, E., Suzuki, M., Tanaka, T., Masuda, T., Tanaka, R., Shimamura, T., Tanaka,
- 809 Y., Suno, C., Ihara, K., Pan, D., Kakinouchi, K., Sugiyama, S., Murata, M., Inoue, T., Tono, K., Song, C., Park,
- 810 J., ... Iwata, S. (2015). Grease matrix as a versatile carrier of proteins for serial crystallography. *Nature*
- 811 *Methods*, 12(1), 61–63. <https://doi.org/10.1038/nmeth.3172>
- 812 Sugahara, M., Nakane, T., Masuda, T., Suzuki, M., Inoue, S., Song, C., Tanaka, R., Nakatsu, T., Mizohata, E.,
- 813 Yumoto, F., Tono, K., Joti, Y., Kameshima, T., Hatsui, T., Yabashi, M., Nureki, O., Numata, K., Nango, E., &
- 814 Iwata, S. (2017). Hydroxyethyl cellulose matrix applied to serial crystallography. *Scientific Reports 2017*
- 815 *7:1*, 7(1), 1–9. <https://doi.org/10.1038/s41598-017-00761-0>
- 816 Tomter, A. B., Bell, C. B., Røhr, A. K., Andersson, K. K., Solomon, E. I., Røhr, Å. K., Andersson, K. K., & Solomon,
- 817 E. I. (2008). Circular dichroism and magnetic circular dichroism studies of the biferrous site of the class Ib
- 818 ribonucleotide reductase from *Bacillus cereus*: comparison to the class Ia enzymes. *Biochemistry*, 47(43),
- 819 11300–11309. <https://doi.org/10.1021/bi801212f>
- 820 Tono, K., Togashi, T., Inubushi, Y., Sato, T., Katayama, T., Ogawa, K., Ohashi, H., Kimura, H., Takahashi, S.,
- 821 Takeshita, K., Tomizawa, H., Goto, S., Ishikawa, T., & Yabashi, M. (2013). Beamline, experimental stations
- 822 and photon beam diagnostics for the hard x-ray free electron laser of SACLA. *New Journal of Physics*,
- 823 15(8), 083035. <https://doi.org/10.1088/1367-2630/15/8/083035>
- 824 Walsh, J. D., & Miller, A. F. (2003). Flavin reduction potential tuning by substitution and bending. *Journal of*
- 825 *Molecular Structure: THEOCHEM*, 623(1–3), 185–195. [https://doi.org/10.1016/S0166-1280\(02\)00719-4](https://doi.org/10.1016/S0166-1280(02)00719-4)
- 826 Williams, C. J., Headd, J. J., Moriarty, N. W., Prisant, M. G., Videau, L. L., Deis, L. N., Verma, V., Keedy, D. A.,
- 827 Hintze, B. J., Chen, V. B., Jain, S., Lewis, S. M., Arendall, W. B., Snoeyink, J., Adams, P. D., Lovell, S. C.,
- 828 Richardson, J. S., & Richardson, D. C. (2018). MolProbity: More and better reference data for improved
- 829 all-atom structure validation. *Protein Science*, 27(1), 293–315. <https://doi.org/10.1002/pro.3330>
- 830 Winter, G., Waterman, D. G., Parkhurst, J. M., Brewster, A. S., Gildea, R. J., Gerstel, M., Fuentes-Montero, L.,
- 831 Vollmar, M., Michels-Clark, T., Young, I. D., Sauter, N. K., Evans, G., & IUCr. (2018). DIALS:
- 832 implementation and evaluation of a new integration package. *Urn:Issn:2059-7983*, 74(2), 85–97.
- 833 <https://doi.org/10.1107/S2059798317017235>
- 834 Zheng, Y. J., & Ornstein, R. L. (1996). A Theoretical Study of the Structures of Flavin in Different Oxidation and
- 835 Protonation States. *Journal of the American Chemical Society*, 118(39), 9402–9408.
- 836 <https://doi.org/10.1021/JA9608151>
- 837

## 838 Supplementary Information

839

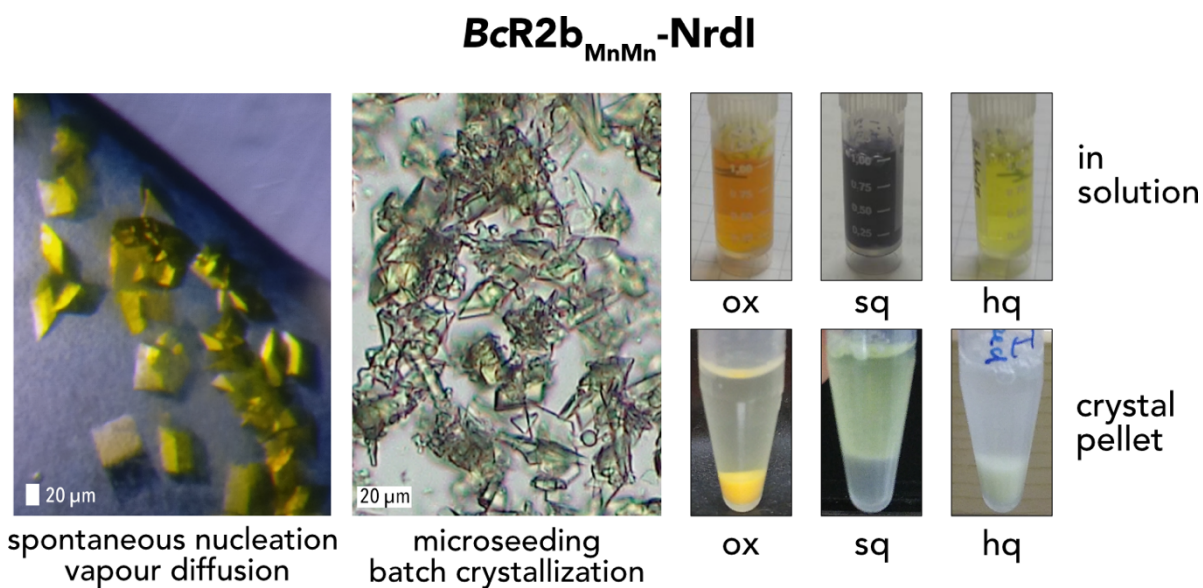

840

841

842

843

844

845

846

S 1 Crystallization of the di-manganese *BcR2b-NrdI* complex. Spontaneous nucleation yields crystals of the length of 100 μm or longer. In the batch crystallization, crystals are significantly smaller with most crystals between 20 and 50 μm. For the two pictures on the left side, crystals of the complex with NrdI in the oxidized state are viewed under an optical microscope. On the right side, pictures are shown for the complex in solution (top row) and in crystals (bottom row) with NrdI in the oxidized, semiquinone and hydroquinone states. The oxidation state of FMN changes the colour of the complex in both solution and crystals.



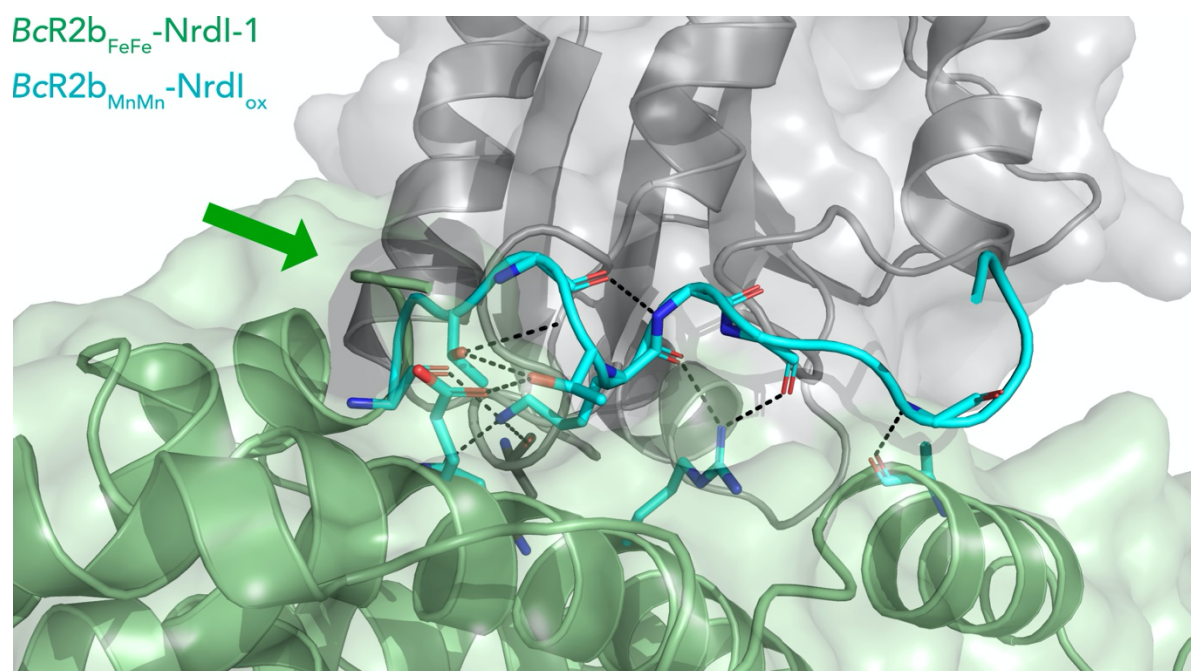

847

848 S 2 **Extended C-terminus in *BcR2b<sub>MnMn</sub>-NrdI<sub>ox</sub>***. Superposition of *BcR2b<sub>FeFe</sub>-NrdI-1* (PDB ID: 4BMO) (pale green

849 for R2b and grey for NrdI) and *BcR2b<sub>MnMn</sub>-NrdI<sub>ox</sub>* (in cyan) showing an extension of the ordered C-terminus by 9

850 amino acids. The green arrow points towards the C-terminus of *BcR2b<sub>FeFe</sub>-NrdI-1*. The C-terminus is situated in

851 a groove between R2b and NrdI; hydrogen bonds are shown with black dashed lines and bonded side chains

852 are shown as sticks.

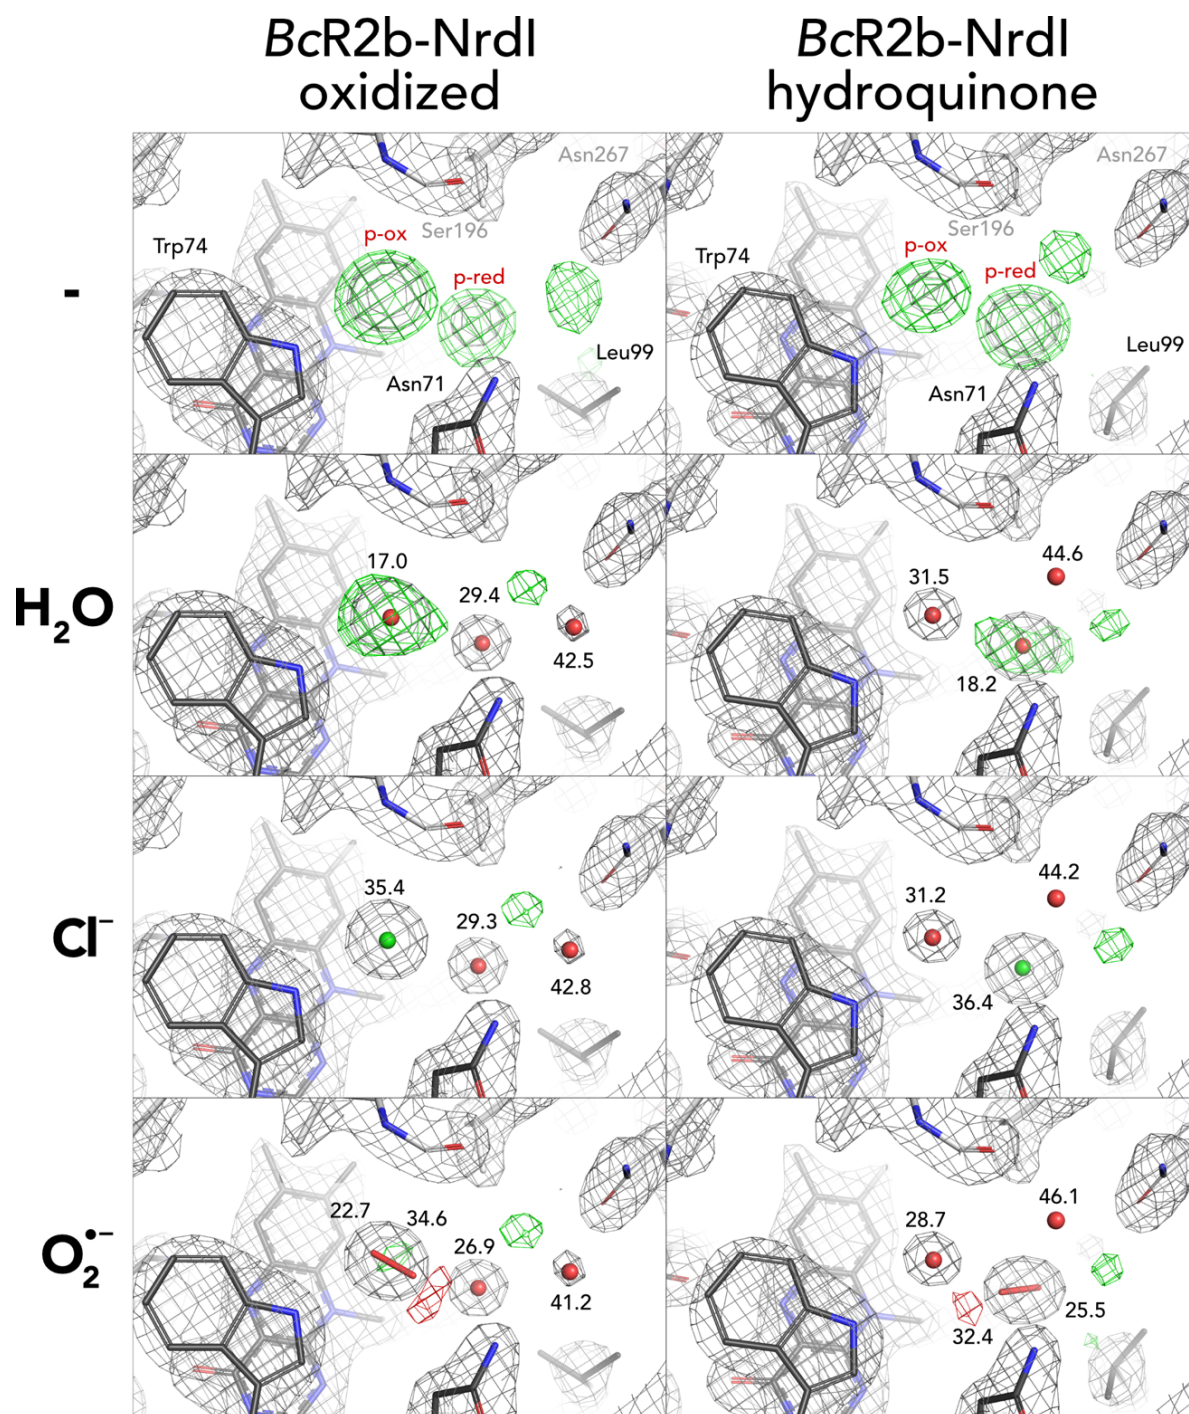

853

854

S 3 Different modelling results for unidentified density close to FMN. Results for both oxidized and

855

hydroquinone *BcR2b-NrdI* complex structures. 2Fo-Fc maps contoured at 2  $\sigma$  are shown in grey, and Fo-Fc

856

maps contoured at 4  $\sigma$  with positive and negative density are shown in green and red, respectively. Refined B-

857

factor values in  $\text{\AA}^2$  are indicated for the different atoms.

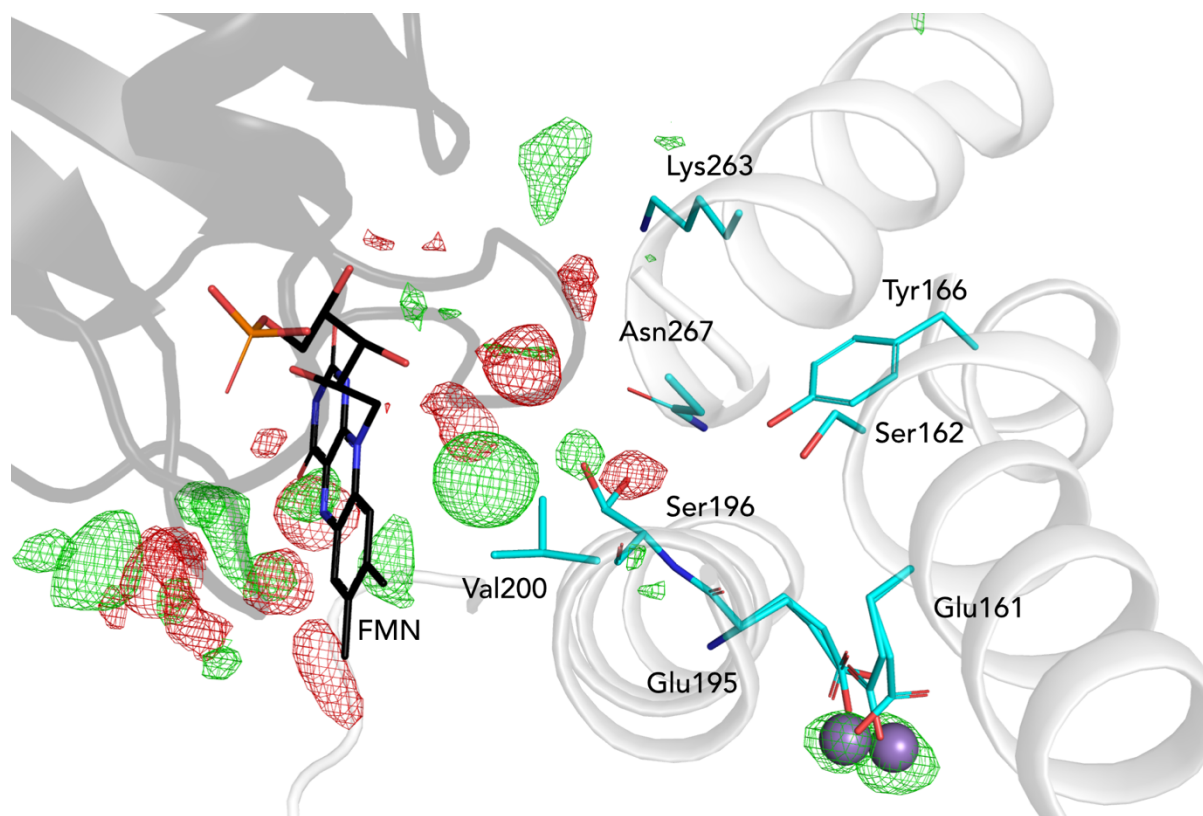

858

859 S 4 Channel between R2b and NrdI. NrdI is represented in black and R2b in white. Residues lining the channel

860 from FMN (black sticks) towards the di-manganese site (purple spheres) are shown as sticks in cyan. The

861 Fo(ox)-Fo(hq) map is shown as mesh and contoured at 4.5  $\sigma$  with green as positive and red as negative density.

862 The observed unknown molecule is in the vicinity of the channel. Changes around the FMN do not protrude

863 towards the metal site in R2b.

864

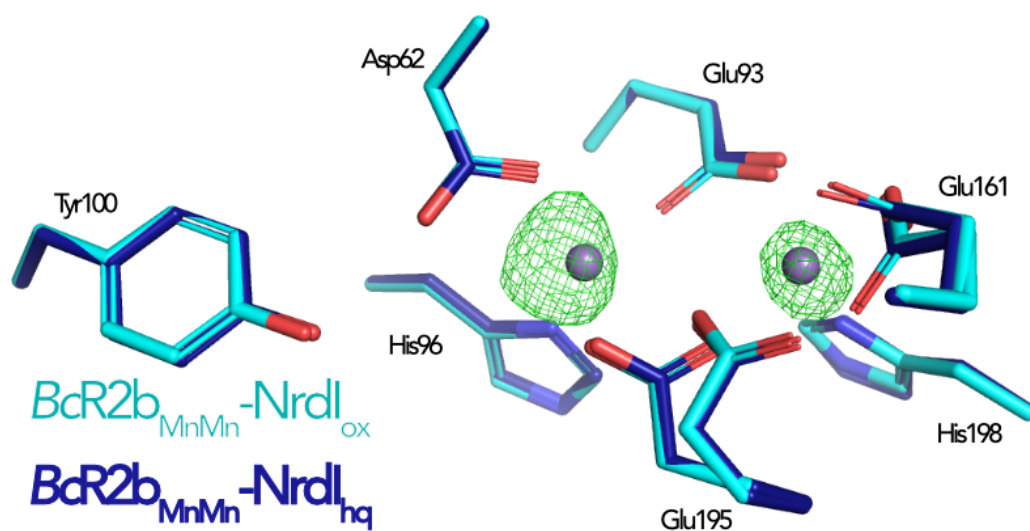

865

866 S 5 Comparison of the active site in di-manganese *BcR2b*<sub>MnMn</sub>-NrdI structures. The Fo(ox)-Fo(hq) map is

867 shown as mesh and contoured at 4.5  $\sigma$ . The only observable change between the structures is the metal

868 occupancy.
